# Supplementary material for: Identification and validation of microglia-associated genes in ischemic stroke using single-cell and bulk RNA-seq
Source: Mol Brain. 2025 Dec 7;18:91. doi: 10.1186/s13041-025-01259-x (PMC12699842; doi:10.1186/s13041-025-01259-x)
Supplement: Supplementary file 1 — Additional file 1. Result of gene ontology (GO) enrichment analysis. [file 13041_2025_1259_MOESM1_ESM.xlsx]

## Sheet: Supplementary Table S1
Table S1 Result of Gene Ontology (GO) enrichment analysis
ONTOLOGY ID Description GeneRatio BgRatio pvalue p.adjust qvalue geneID Count
BP GO:0050900 leukocyte migration 17/49 386/28564 5.15301906071465e-20 5.98258496883194e-17 2.98844880475747e-17 Ccl2/Ccl4/Ccl9/Ccl3/C5ar1/Spp1/P2ry12/Tlr2/Tnf/Fcgr3/Lgals3/Adam8/C3ar1/Cxcl16/Csf1/Cd9/Lgmn 17
BP GO:0097529 myeloid leukocyte migration 15/49 242/28564 6.54908042565073e-20 5.98258496883194e-17 2.98844880475747e-17 Ccl2/Ccl4/Ccl9/Ccl3/C5ar1/Spp1/P2ry12/Tlr2/Fcgr3/Lgals3/Adam8/C3ar1/Csf1/Cd9/Lgmn 15
BP GO:0097530 granulocyte migration 12/49 162/28564 5.63625435194956e-17 3.43247890033728e-14 1.71460790285623e-14 Ccl2/Ccl4/Ccl9/Ccl3/C5ar1/Spp1/Tlr2/Fcgr3/Lgals3/Adam8/C3ar1/Csf1 12
BP GO:0030595 leukocyte chemotaxis 13/49 230/28564 8.64051377686343e-17 3.94655466758237e-14 1.97140143277384e-14 Ccl2/Ccl4/Ccl9/Ccl3/C5ar1/Spp1/Fcgr3/Lgals3/Adam8/C3ar1/Cxcl16/Csf1/Lgmn 13
BP GO:1990266 neutrophil migration 11/49 132/28564 3.36803188255043e-16 1.23067884988393e-13 6.14754450983415e-14 Ccl2/Ccl4/Ccl9/Ccl3/C5ar1/Spp1/Tlr2/Fcgr3/Lgals3/Adam8/C3ar1 11
BP GO:0060326 cell chemotaxis 13/49 308/28564 3.83533968101461e-15 1.16786093286895e-12 5.83375351480644e-13 Ccl2/Ccl4/Ccl9/Ccl3/C5ar1/Spp1/Fcgr3/Lgals3/Adam8/C3ar1/Cxcl16/Csf1/Lgmn 13
BP GO:0071674 mononuclear cell migration 11/49 185/28564 1.46582307831098e-14 3.82579823439167e-12 1.91108061488064e-12 Ccl2/Ccl4/Ccl9/Ccl3/C5ar1/Lgals3/Adam8/C3ar1/Cxcl16/Csf1/Lgmn 11
BP GO:0071621 granulocyte chemotaxis 10/49 131/28564 2.04956353169898e-14 4.68069071551754e-12 2.33812050260923e-12 Ccl2/Ccl4/Ccl9/Ccl3/C5ar1/Spp1/Fcgr3/Lgals3/C3ar1/Csf1 10
BP GO:0030593 neutrophil chemotaxis 9/49 105/28564 1.56979963505514e-13 3.18669325916193e-11 1.59183191063486e-11 Ccl2/Ccl4/Ccl9/Ccl3/C5ar1/Spp1/Fcgr3/Lgals3/C3ar1 9
BP GO:1905517 macrophage migration 8/49 67/28564 2.48437476365132e-13 4.53895269319096e-11 2.2673188632481e-11 Ccl2/Ccl3/C5ar1/P2ry12/Lgals3/C3ar1/Csf1/Cd9 8
BP GO:1903557 positive regulation of tumor necrosis factor superfamily cytokine production 9/49 116/28564 3.92748692727988e-13 6.52319874194577e-11 3.25849872339872e-11 Ccl2/Ccl4/Ccl3/Cd14/Tlr2/Fcgr3/Adam8/Cybb/Lpl 9
BP GO:0034341 response to type II interferon 9/49 146/28564 3.20380812802949e-12 4.8777978749249e-10 2.43658039210664e-10 Ccl2/Ccl4/Ccl9/Ccl3/Tlr2/Tnf/Capg/Irf8/Cxcl16 9
BP GO:0072677 eosinophil migration 6/49 27/28564 5.34318129078926e-12 7.50922478328614e-10 3.75104306001157e-10 Ccl2/Ccl4/Ccl9/Ccl3/Lgals3/Adam8 6
BP GO:0002685 regulation of leukocyte migration 10/49 236/28564 7.58898428496804e-12 9.90362449188329e-10 4.94710479328368e-10 Ccl2/C5ar1/P2ry12/Tlr2/Lgals3/Adam8/C3ar1/Csf1/Cd9/Lgmn 10
BP GO:0002687 positive regulation of leukocyte migration 9/49 164/28564 9.17064142731126e-12 1.11698412584651e-09 5.57961131051148e-10 Ccl2/C5ar1/P2ry12/Tlr2/Lgals3/Adam8/C3ar1/Csf1/Lgmn 9
BP GO:0032760 positive regulation of tumor necrosis factor production 8/49 114/28564 1.9739798252887e-11 2.25403821300154e-09 1.12594770297717e-09 Ccl2/Ccl4/Ccl3/Cd14/Tlr2/Fcgr3/Cybb/Lpl 8
BP GO:0071346 cellular response to type II interferon 8/49 118/28564 2.61046307926055e-11 2.80548002694648e-09 1.40140649518198e-09 Ccl2/Ccl4/Ccl9/Ccl3/Tlr2/Tnf/Capg/Irf8 8
BP GO:1903555 regulation of tumor necrosis factor superfamily cytokine production 9/49 188/28564 3.13050356046803e-11 3.17746111387505e-09 1.58722022627239e-09 Ccl2/Ccl4/Ccl3/Cd14/Tlr2/Fcgr3/Adam8/Cybb/Lpl 9
BP GO:0071706 tumor necrosis factor superfamily cytokine production 9/49 195/28564 4.34243715319086e-11 4.17559614677879e-09 2.08581330294542e-09 Ccl2/Ccl4/Ccl3/Cd14/Tlr2/Fcgr3/Adam8/Cybb/Lpl 9
BP GO:0048246 macrophage chemotaxis 6/49 47/28564 1.88877891601468e-10 1.72539953977941e-08 8.6187964220249e-09 Ccl2/Ccl3/C5ar1/Lgals3/C3ar1/Csf1 6
BP GO:0050729 positive regulation of inflammatory response 8/49 152/28564 2.00204563150611e-10 1.74177969941032e-08 8.70061936098145e-09 Ccl3/Tlr2/Tnf/Fcgr3/Adam8/Lpl/Lgals1/Alox5ap 8
BP GO:1905521 regulation of macrophage migration 6/49 49/28564 2.45345898703082e-10 2.03748616786605e-08 1.01777461328025e-08 Ccl2/C5ar1/P2ry12/C3ar1/Csf1/Cd9 6
BP GO:0048245 eosinophil chemotaxis 5/49 23/28564 3.95814933125612e-10 3.05042821610969e-08 1.5237641594602e-08 Ccl2/Ccl4/Ccl9/Ccl3/Lgals3 5
BP GO:0048247 lymphocyte chemotaxis 6/49 53/28564 4.00713066155625e-10 3.05042821610969e-08 1.5237641594602e-08 Ccl2/Ccl4/Ccl9/Ccl3/Adam8/Cxcl16 6
BP GO:0002548 monocyte chemotaxis 6/49 59/28564 7.80387592336734e-10 5.70307252479685e-08 2.84882544234083e-08 Ccl2/Ccl4/Ccl9/Ccl3/Lgals3/Lgmn 6
BP GO:0032680 regulation of tumor necrosis factor production 8/49 185/28564 9.56015877842342e-10 6.71785003391523e-08 3.35573184651543e-08 Ccl2/Ccl4/Ccl3/Cd14/Tlr2/Fcgr3/Cybb/Lpl 8
BP GO:0032640 tumor necrosis factor production 8/49 192/28564 1.28253770926833e-09 8.67850516604906e-08 4.33512746173741e-08 Ccl2/Ccl4/Ccl3/Cd14/Tlr2/Fcgr3/Cybb/Lpl 8
BP GO:0071675 regulation of mononuclear cell migration 7/49 122/28564 1.61298037261612e-09 1.05246969313202e-07 5.25734580097058e-08 Ccl2/C5ar1/Lgals3/Adam8/C3ar1/Csf1/Lgmn 7
BP GO:1905523 positive regulation of macrophage migration 5/49 31/28564 1.97823829507966e-09 1.24629012590018e-07 6.22552668542309e-08 Ccl2/C5ar1/P2ry12/C3ar1/Csf1 5
BP GO:0045670 regulation of osteoclast differentiation 6/49 93/28564 1.26346859163733e-08 7.69452372307136e-07 3.84360445245462e-07 Ccl9/Ccl3/Tnf/Adam8/Mafb/Csf1 6
BP GO:0042063 gliogenesis 9/49 378/28564 1.45801432934742e-08 8.59287799908947e-07 4.2923545790975e-07 Ccl2/Ccl3/C5ar1/P2ry12/Tlr2/Tnf/Csf1/C1qa/Cd9 9
BP GO:0072676 lymphocyte migration 6/49 110/28564 3.47313198017905e-08 1.98294128993348e-06 9.90528100926065e-07 Ccl2/Ccl4/Ccl9/Ccl3/Adam8/Cxcl16 6
BP GO:0034612 response to tumor necrosis factor 7/49 207/28564 6.29335641224733e-08 3.4842309591442e-06 1.74045933314783e-06 Ccl2/Ccl4/Ccl9/Ccl3/Cd14/Tnf/Cxcl16 7
BP GO:0031349 positive regulation of defense response 9/49 452/28564 6.7390802622199e-08 3.62126459972816e-06 1.80891101775376e-06 Ccl3/Cd14/Tlr2/Tnf/Fcgr3/Adam8/Lpl/Lgals1/Alox5ap 9
BP GO:0010759 positive regulation of macrophage chemotaxis 4/49 25/28564 9.41235053083617e-08 4.91324697709648e-06 2.45428809330375e-06 Ccl2/C5ar1/C3ar1/Csf1 4
BP GO:0030316 osteoclast differentiation 6/49 134/28564 1.12841384406469e-07 5.72670025862832e-06 2.86062807837453e-06 Ccl9/Ccl3/Tnf/Adam8/Mafb/Csf1 6
BP GO:0030099 myeloid cell differentiation 9/49 482/28564 1.16247219518371e-07 5.74009919081254e-06 2.8673211756025e-06 Ccl9/Ccl3/Tlr2/Tnf/Adam8/Irf8/Mafb/Csf1/Dab2 9
BP GO:0008347 glial cell migration 5/49 71/28564 1.43997316568309e-07 6.9232394044816e-06 3.45832890484e-06 Ccl2/Ccl3/P2ry12/Csf1/Cd9 5
BP GO:0071677 positive regulation of mononuclear cell migration 5/49 74/28564 1.77474367673214e-07 8.31399153176827e-06 4.15304390749465e-06 Ccl2/Lgals3/Adam8/Csf1/Lgmn 5
BP GO:0002761 regulation of myeloid leukocyte differentiation 6/49 152/28564 2.38073440882971e-07 1.05146306444029e-05 5.25231744228234e-06 Ccl9/Ccl3/Tnf/Adam8/Mafb/Csf1 6
BP GO:0050727 regulation of inflammatory response 8/49 377/28564 2.40473591294445e-07 1.05146306444029e-05 5.25231744228234e-06 Ccl3/Tlr2/Tnf/Fcgr3/Adam8/Lpl/Lgals1/Alox5ap 8
BP GO:0071347 cellular response to interleukin-1 5/49 79/28564 2.46712495819575e-07 1.05146306444029e-05 5.25231744228234e-06 Ccl2/Ccl4/Ccl9/Ccl3/Il1rn 5
BP GO:0050921 positive regulation of chemotaxis 6/49 153/28564 2.47470781450096e-07 1.05146306444029e-05 5.25231744228234e-06 Ccl2/C5ar1/P2ry12/C3ar1/Csf1/Lgmn 6
BP GO:0002675 positive regulation of acute inflammatory response 4/49 34/28564 3.41172324949928e-07 1.38515963929671e-05 6.91921416915994e-06 Tnf/Fcgr3/Adam8/Alox5ap 4
BP GO:0010758 regulation of macrophage chemotaxis 4/49 34/28564 3.41172324949928e-07 1.38515963929671e-05 6.91921416915994e-06 Ccl2/C5ar1/C3ar1/Csf1 4
BP GO:1901214 regulation of neuron death 8/49 405/28564 4.13636488348331e-07 1.6428562265487e-05 8.20647220590395e-06 Ccl3/C5ar1/Tnf/Adam8/Mt1/Csf1/C1qa/Lgmn 8
BP GO:0002573 myeloid leukocyte differentiation 7/49 277/28564 4.53472751826327e-07 1.76275471826957e-05 8.80539475550785e-06 Ccl9/Ccl3/Tlr2/Tnf/Adam8/Mafb/Csf1 7
BP GO:0010573 vascular endothelial growth factor production 4/49 37/28564 4.84036749181674e-07 1.80476559337738e-05 9.01524944233107e-06 Ccl2/C5ar1/Tnf/C3ar1 4
BP GO:0045672 positive regulation of osteoclast differentiation 4/49 37/28564 4.84036749181674e-07 1.80476559337738e-05 9.01524944233107e-06 Ccl9/Ccl3/Tnf/Csf1 4
BP GO:0034109 homotypic cell-cell adhesion 5/49 91/28564 5.01289057970717e-07 1.831710217825e-05 9.14984448969709e-06 P2ry12/Plek/Plaur/Lgals1/Cd9 5
BP GO:0070555 response to interleukin-1 5/49 94/28564 5.89416313177605e-07 2.11149726308919e-05 1.05474498147572e-05 Ccl2/Ccl4/Ccl9/Ccl3/Il1rn 5
BP GO:0002690 positive regulation of leukocyte chemotaxis 5/49 100/28564 8.02229142442469e-07 2.8186012370046e-05 1.40796086335551e-05 Ccl2/C5ar1/C3ar1/Csf1/Lgmn 5
BP GO:0045765 regulation of angiogenesis 7/49 305/28564 8.64286294777375e-07 2.97934162369484e-05 1.48825465257594e-05 Ccl2/C5ar1/Tnf/Lgals3/Cybb/C3ar1/Hk2 7
BP GO:1901342 regulation of vasculature development 7/49 309/28564 9.42794857582611e-07 3.1897892681545e-05 1.59337844351681e-05 Ccl2/C5ar1/Tnf/Lgals3/Cybb/C3ar1/Hk2 7
BP GO:1902624 positive regulation of neutrophil migration 4/49 44/28564 9.86166590349762e-07 3.27586611012548e-05 1.63637594992008e-05 C5ar1/Tlr2/Adam8/C3ar1 4
BP GO:0070997 neuron death 8/49 461/28564 1.09401808620591e-06 3.56923400624677e-05 1.78292045251978e-05 Ccl3/C5ar1/Tnf/Adam8/Mt1/Csf1/C1qa/Lgmn 8
BP GO:0001774 microglial cell activation 4/49 47/28564 1.29084817872509e-06 4.13750810970306e-05 2.06678738865126e-05 C5ar1/Tlr2/Tnf/C1qa 4
BP GO:0070372 regulation of ERK1 and ERK2 cascade 7/49 329/28564 1.43113066614131e-06 4.50806159834512e-05 2.25188799917335e-05 Ccl2/Ccl4/Ccl9/Ccl3/C5ar1/Tlr2/Dab2 7
BP GO:0002253 activation of immune response 8/49 482/28564 1.52485834702478e-06 4.72189186443098e-05 2.35870149307848e-05 C5ar1/Cd14/Tlr2/Tnf/Lgals3/C3ar1/C1qa/C1qb 8
BP GO:0002526 acute inflammatory response 5/49 116/28564 1.67429124407095e-06 5.09821683819605e-05 2.54668510282371e-05 Tnf/Fcgr3/Adam8/Il1rn/Alox5ap 5
BP GO:0002269 leukocyte activation involved in inflammatory response 4/49 51/28564 1.7994633724433e-06 5.38954029746544e-05 2.69220835877195e-05 C5ar1/Tlr2/Tnf/C1qa 4
BP GO:0010744 positive regulation of macrophage derived foam cell differentiation 3/49 15/28564 2.12734492157858e-06 6.26880511568397e-05 3.13142283023536e-05 Msr1/Lpl/Csf1 3
BP GO:1902622 regulation of neutrophil migration 4/49 54/28564 2.26864855433185e-06 6.51228480429748e-05 3.25304694225559e-05 C5ar1/Tlr2/Adam8/C3ar1 4
BP GO:0070371 ERK1 and ERK2 cascade 7/49 353/28564 2.28126013943644e-06 6.51228480429748e-05 3.25304694225559e-05 Ccl2/Ccl4/Ccl9/Ccl3/C5ar1/Tlr2/Dab2 7
BP GO:0061900 glial cell activation 4/49 55/28564 2.44350153585907e-06 6.86811893233003e-05 3.43079486897136e-05 C5ar1/Tlr2/Tnf/C1qa 4
BP GO:0002688 regulation of leukocyte chemotaxis 5/49 126/28564 2.51690271038721e-06 6.9319267337745e-05 3.46266844017083e-05 Ccl2/C5ar1/C3ar1/Csf1/Lgmn 5
BP GO:0070374 positive regulation of ERK1 and ERK2 cascade 6/49 228/28564 2.54208588485436e-06 6.9319267337745e-05 3.46266844017083e-05 Ccl2/Ccl4/Ccl9/Ccl3/C5ar1/Tlr2 6
BP GO:0051235 maintenance of location 7/49 364/28564 2.79305475566419e-06 7.3678808444482e-05 3.68043827507654e-05 Msr1/Tnf/Srgn/Lpl/Plin2/Hk2/Ftl1 7
BP GO:0050920 regulation of chemotaxis 6/49 232/28564 2.81037876649552e-06 7.3678808444482e-05 3.68043827507654e-05 Ccl2/C5ar1/P2ry12/C3ar1/Csf1/Lgmn 6
BP GO:0002673 regulation of acute inflammatory response 4/49 57/28564 2.82294285227901e-06 7.3678808444482e-05 3.68043827507654e-05 Tnf/Fcgr3/Adam8/Alox5ap 4
BP GO:0031589 cell-substrate adhesion 7/49 369/28564 3.05556872878954e-06 7.86270995422323e-05 3.92761762470057e-05 Spp1/Adam8/Sdc4/Cd63/Csf1/Lgals1/Dab2 7
BP GO:0045637 regulation of myeloid cell differentiation 6/49 236/28564 3.10132767147933e-06 7.86961896637879e-05 3.93106884674353e-05 Ccl9/Ccl3/Tnf/Adam8/Mafb/Csf1 6
BP GO:1905954 positive regulation of lipid localization 5/49 134/28564 3.40553152460154e-06 8.43475257945288e-05 4.21336703044142e-05 Msr1/Spp1/Lpl/Plin2/Dab2 5
BP GO:0006909 phagocytosis 6/49 240/28564 3.41637488166126e-06 8.43475257945288e-05 4.21336703044142e-05 Ccl2/Msr1/Tlr2/Tnf/Fcgr3/Irf8 6
BP GO:0071622 regulation of granulocyte chemotaxis 4/49 60/28564 3.47174378884925e-06 8.45716786963678e-05 4.22456402095762e-05 Ccl2/C5ar1/C3ar1/Csf1 4
BP GO:0030730 sequestering of triglyceride 3/49 18/28564 3.80139498429454e-06 9.13835346882385e-05 4.56483303515702e-05 Tnf/Lpl/Plin2 3
BP GO:0042060 wound healing 7/49 392/28564 4.54431582334708e-06 0.000107824220899417 5.38608587674904e-05 Ccl2/P2ry12/Tnf/Plek/Plaur/Sdc4/Cd9 7
BP GO:0032731 positive regulation of interleukin-1 beta production 4/49 67/28564 5.40909530158073e-06 0.000126697655333179 6.32886049456207e-05 Ccl3/Tlr2/Tnf/Lpl 4
BP GO:0002237 response to molecule of bacterial origin 7/49 414/28564 6.49185546443909e-06 0.000150134429538357 7.4995851934293e-05 Ccl2/C5ar1/Cd14/Tlr2/Tnf/Irf8/Cxcl16 7
BP GO:0070098 chemokine-mediated signaling pathway 4/49 71/28564 6.82243267838668e-06 0.000155807306292656 7.7829593844227e-05 Ccl2/Ccl4/Ccl9/Ccl3 4
BP GO:0006898 receptor-mediated endocytosis 6/49 273/28564 7.14632066821225e-06 0.000161189232849676 8.05179989517872e-05 Msr1/Cd14/Cd63/Cxcl16/Cd9/Dab2 6
BP GO:0002763 positive regulation of myeloid leukocyte differentiation 4/49 74/28564 8.04877266412789e-06 0.000179330581187337 8.95800500616031e-05 Ccl9/Ccl3/Tnf/Csf1 4
BP GO:0019221 cytokine-mediated signaling pathway 7/49 429/28564 8.18322490642605e-06 0.000180129541012535 8.9979150207627e-05 Ccl2/Ccl4/Ccl9/Ccl3/Tnf/Il1rn/Csf1 7
BP GO:0032732 positive regulation of interleukin-1 production 4/49 78/28564 9.92789333808284e-06 0.000213391307396204 0.000106594223208889 Ccl3/Tlr2/Tnf/Lpl 4
BP GO:0150076 neuroinflammatory response 4/49 78/28564 9.92789333808284e-06 0.000213391307396204 0.000106594223208889 C5ar1/Tlr2/Tnf/C1qa 4
BP GO:0010743 regulation of macrophage derived foam cell differentiation 3/49 25/28564 1.06245303426565e-05 0.000223115137195786 0.000111451516117158 Msr1/Lpl/Csf1 3
BP GO:0010884 positive regulation of lipid storage 3/49 25/28564 1.06245303426565e-05 0.000223115137195786 0.000111451516117158 Msr1/Lpl/Plin2 3
BP GO:0043523 regulation of neuron apoptotic process 6/49 294/28564 1.08925950229613e-05 0.000226145126215345 0.00011296507039363 Ccl3/C5ar1/Tnf/Adam8/Mt1/Lgmn 6
BP GO:0022411 cellular component disassembly 7/49 450/28564 1.11537669495391e-05 0.000228965530525933 0.000114373931936729 Tnf/Plek/Capg/Plin2/Hk2/C1qa/C1qb 7
BP GO:1990868 response to chemokine 4/49 81/28564 1.15359475982155e-05 0.000231606332548788 0.000115693077705643 Ccl2/Ccl4/Ccl9/Ccl3 4
BP GO:1990869 cellular response to chemokine 4/49 81/28564 1.15359475982155e-05 0.000231606332548788 0.000115693077705643 Ccl2/Ccl4/Ccl9/Ccl3 4
BP GO:0015850 organic hydroxy compound transport 6/49 306/28564 1.36621993661394e-05 0.000271313459151486 0.000135527767167539 Msr1/Spp1/P2ry12/Fcgr3/Lgals3/Dab2 6
BP GO:0045766 positive regulation of angiogenesis 5/49 181/28564 1.47043150434509e-05 0.000285795570046646 0.000142761938887703 C5ar1/Lgals3/Cybb/C3ar1/Hk2 5
BP GO:1904018 positive regulation of vasculature development 5/49 181/28564 1.47043150434509e-05 0.000285795570046646 0.000142761938887703 C5ar1/Lgals3/Cybb/C3ar1/Hk2 5
BP GO:0010742 macrophage derived foam cell differentiation 3/49 29/28564 1.67978379496181e-05 0.000319741808116314 0.000159718922384608 Msr1/Lpl/Csf1 3
BP GO:0007162 negative regulation of cell adhesion 6/49 318/28564 1.69758923849384e-05 0.000319741808116314 0.000159718922384608 Lgals3/Adam8/Il1rn/Sdc4/Lgals1/Cd9 6
BP GO:0071219 cellular response to molecule of bacterial origin 6/49 318/28564 1.69758923849384e-05 0.000319741808116314 0.000159718922384608 Ccl2/Cd14/Tlr2/Tnf/Irf8/Cxcl16 6
BP GO:0071356 cellular response to tumor necrosis factor 5/49 187/28564 1.72067832113349e-05 0.00032078360129703 0.000160239323783323 Ccl2/Ccl4/Ccl9/Ccl3/Tnf 5
BP GO:0019915 lipid storage 4/49 92/28564 1.91075397410452e-05 0.000352620960675652 0.000176142870340098 Msr1/Tnf/Lpl/Plin2 4
BP GO:0090077 foam cell differentiation 3/49 31/28564 2.06141854207258e-05 0.000376621167636661 0.000188131565892308 Msr1/Lpl/Csf1 3
BP GO:1905952 regulation of lipid localization 5/49 196/28564 2.15695660515081e-05 0.00039017422946639 0.000194901654681163 Msr1/Spp1/Lpl/Plin2/Dab2 5
BP GO:0051402 neuron apoptotic process 6/49 337/28564 2.35262855418305e-05 0.00042139729102867 0.000210498344321642 Ccl3/C5ar1/Tnf/Adam8/Mt1/Lgmn 6
BP GO:0010574 regulation of vascular endothelial growth factor production 3/49 33/28564 2.4961035265444e-05 0.000442755450776371 0.000221167272101584 Ccl2/C5ar1/C3ar1 3
BP GO:0071216 cellular response to biotic stimulus 6/49 345/28564 2.68319050036742e-05 0.000471364331170315 0.000235458113746817 Ccl2/Cd14/Tlr2/Tnf/Irf8/Cxcl16 6
BP GO:0032651 regulation of interleukin-1 beta production 4/49 102/28564 2.86968596102108e-05 0.000499325357217668 0.00024942533616093 Ccl3/Tlr2/Tnf/Lpl 4
BP GO:0022408 negative regulation of cell-cell adhesion 5/49 211/28564 3.07055152000179e-05 0.00051943496546697 0.00025947058166097 Lgals3/Adam8/Il1rn/Sdc4/Cd9 5
BP GO:1902107 positive regulation of leukocyte differentiation 5/49 211/28564 3.07055152000179e-05 0.00051943496546697 0.00025947058166097 Ccl9/Ccl3/Tnf/Adam8/Csf1 5
BP GO:1903708 positive regulation of hemopoiesis 5/49 211/28564 3.07055152000179e-05 0.00051943496546697 0.00025947058166097 Ccl9/Ccl3/Tnf/Adam8/Csf1 5
BP GO:1902105 regulation of leukocyte differentiation 6/49 359/28564 3.35111983114231e-05 0.000561696874449266 0.000280581447957545 Ccl9/Ccl3/Tnf/Adam8/Mafb/Csf1 6
BP GO:0097242 amyloid-beta clearance 3/49 37/28564 3.53763554495589e-05 0.000587569103694038 0.000293505264830312 Msr1/C5ar1/Tnf 3
BP GO:0032611 interleukin-1 beta production 4/49 108/28564 3.59171407815128e-05 0.000591176722593009 0.000295307359483847 Ccl3/Tlr2/Tnf/Lpl 4
BP GO:0042116 macrophage activation 4/49 109/28564 3.72385340365914e-05 0.000607453586471898 0.000303438054602676 C5ar1/Tlr2/Tnf/C1qa 4
BP GO:0051953 negative regulation of amine transport 3/49 38/28564 3.83623029846924e-05 0.000620247146487019 0.000309828753495374 P2ry12/Tnf/Il1rn 3
BP GO:0034110 regulation of homotypic cell-cell adhesion 3/49 40/28564 4.4820550771035e-05 0.000718308300514745 0.00035881271946895 Plaur/Lgals1/Cd9 3
BP GO:1903037 regulation of leukocyte cell-cell adhesion 6/49 380/28564 4.5978094789835e-05 0.000729231514657123 0.00036426913444976 Ccl2/Tnf/Lgals3/Adam8/Sdc4/Lgals1 6
BP GO:0010810 regulation of cell-substrate adhesion 5/49 230/28564 4.63004136290237e-05 0.000729231514657123 0.00036426913444976 Spp1/Sdc4/Csf1/Lgals1/Dab2 5
BP GO:0045639 positive regulation of myeloid cell differentiation 4/49 116/28564 4.75080863541335e-05 0.000741857040760699 0.000370575896257613 Ccl9/Ccl3/Tnf/Csf1 4
BP GO:0002757 immune response-activating signaling pathway 6/49 391/28564 5.38546040917572e-05 0.000833833573522376 0.000416520443778354 C5ar1/Cd14/Tlr2/Tnf/Lgals3/C3ar1 6
BP GO:0032652 regulation of interleukin-1 production 4/49 122/28564 5.7839486422051e-05 0.000888006232715018 0.00044358102368791 Ccl3/Tlr2/Tnf/Lpl 4
BP GO:0002764 immune response-regulating signaling pathway 6/49 402/28564 6.27776051264013e-05 0.000955789038049459 0.000477440207408683 C5ar1/Cd14/Tlr2/Tnf/Lgals3/C3ar1 6
BP GO:0050764 regulation of phagocytosis 4/49 125/28564 6.3578335593054e-05 0.000959980323376114 0.000479533857844087 Ccl2/Tlr2/Tnf/Fcgr3 4
BP GO:0002931 response to ischemia 3/49 46/28564 6.83674099712683e-05 0.00102382998375006 0.000511428338611644 Hk2/Csf1/Rcan1 3
BP GO:0032612 interleukin-1 production 4/49 128/28564 6.97217670020689e-05 0.0010356233196161 0.000517319400862591 Ccl3/Tlr2/Tnf/Lpl 4
BP GO:0007159 leukocyte cell-cell adhesion 6/49 420/28564 7.98991216441399e-05 0.00117722334874067 0.00058805210921451 Ccl2/Tnf/Lgals3/Adam8/Sdc4/Lgals1 6
BP GO:0002274 myeloid leukocyte activation 5/49 264/28564 8.88168869830877e-05 0.00129814762014481 0.000648456766436523 C5ar1/Tlr2/Tnf/Fcgr3/C1qa 5
BP GO:0061041 regulation of wound healing 4/49 137/28564 9.075233664773e-05 0.00131590888139208 0.000657328954666516 Ccl2/Tnf/Plaur/Cd9 4
BP GO:0043254 regulation of protein-containing complex assembly 6/49 435/28564 9.68505793437168e-05 0.001393275657173 0.000695975568097824 P2ry12/Tlr2/Tnf/Plek/Lgals3/Capg 6
BP GO:0002429 immune response-activating cell surface receptor signaling pathway 5/49 272/28564 0.000102177719206317 0.00145842728898391 0.000728520415722668 C5ar1/Cd14/Tlr2/Lgals3/C3ar1 5
BP GO:1901215 negative regulation of neuron death 5/49 273/28564 0.00010395069305964 0.00146512797652872 0.000731867574482414 C5ar1/Adam8/Mt1/Csf1/Lgmn 5
BP GO:0010811 positive regulation of cell-substrate adhesion 4/49 142/28564 0.000104251032812662 0.00146512797652872 0.000731867574482414 Spp1/Sdc4/Csf1/Dab2 4
BP GO:1903706 regulation of hemopoiesis 6/49 447/28564 0.000112378187043646 0.00156728967731863 0.000782899864739581 Ccl9/Ccl3/Tnf/Adam8/Mafb/Csf1 6
BP GO:0002455 humoral immune response mediated by circulating immunoglobulin 3/49 55/28564 0.000116881561586235 0.0016055835565267 0.000802028602257744 Tnf/C1qa/C1qb 3
BP GO:0010883 regulation of lipid storage 3/49 55/28564 0.000116881561586235 0.0016055835565267 0.000802028602257744 Msr1/Lpl/Plin2 3
BP GO:0002768 immune response-regulating cell surface receptor signaling pathway 5/49 283/28564 0.000123012216787603 0.00167718895575336 0.000837797265945417 C5ar1/Cd14/Tlr2/Lgals3/C3ar1 5
BP GO:0032661 regulation of interleukin-18 production 2/49 10/28564 0.000128592284180924 0.00171487666568283 0.000856623206952446 Tlr2/Tnf 2
BP GO:0070391 response to lipoteichoic acid 2/49 10/28564 0.000128592284180924 0.00171487666568283 0.000856623206952446 Cd14/Tlr2 2
BP GO:0071223 cellular response to lipoteichoic acid 2/49 10/28564 0.000128592284180924 0.00171487666568283 0.000856623206952446 Cd14/Tlr2 2
BP GO:0032757 positive regulation of interleukin-8 production 3/49 59/28564 0.000144136800893498 0.00190824590748132 0.000953215914375768 Cd14/Tlr2/Tnf 3
BP GO:0001667 ameboidal-type cell migration 6/49 470/28564 0.000147650177418283 0.00194069693628204 0.000969426003950408 P2ry12/Tnf/Adam8/Sdc4/Cd63/Lgmn 6
BP GO:0002443 leukocyte mediated immunity 6/49 480/28564 0.0001654903703961 0.0021596493336691 0.0010787981288227 Ccl2/Tlr2/Tnf/Fcgr3/C1qa/C1qb 6
BP GO:0070527 platelet aggregation 3/49 62/28564 0.000167079374610675 0.00216492210931704 0.00108143201035801 P2ry12/Plek/Cd9 3
BP GO:0071222 cellular response to lipopolysaccharide 5/49 308/28564 0.000182437795083536 0.00233891832632046 0.00116834741389096 Ccl2/Cd14/Tnf/Irf8/Cxcl16 5
BP GO:0016064 immunoglobulin mediated immune response 4/49 165/28564 0.000185741317977918 0.00233891832632046 0.00116834741389096 Tnf/Fcgr3/C1qa/C1qb 4
BP GO:0032621 interleukin-18 production 2/49 12/28564 0.000188188830853371 0.00233891832632046 0.00116834741389096 Tlr2/Tnf 2
BP GO:0033625 positive regulation of integrin activation 2/49 12/28564 0.000188188830853371 0.00233891832632046 0.00116834741389096 P2ry12/Plek 2
BP GO:0036005 response to macrophage colony-stimulating factor 2/49 12/28564 0.000188188830853371 0.00233891832632046 0.00116834741389096 Tlr2/Csf1 2
BP GO:0036006 cellular response to macrophage colony-stimulating factor stimulus 2/49 12/28564 0.000188188830853371 0.00233891832632046 0.00116834741389096 Tlr2/Csf1 2
BP GO:0019724 B cell mediated immunity 4/49 168/28564 0.000199002830447784 0.00245660926505474 0.00122713694166592 Tnf/Fcgr3/C1qa/C1qb 4
BP GO:0010876 lipid localization 6/49 500/28564 0.000206284884512391 0.00252941264432307 0.00126350402594308 Msr1/Spp1/Tnf/Lpl/Plin2/Dab2 6
BP GO:0072678 T cell migration 3/49 67/28564 0.000210361445820177 0.00256220241008975 0.00127988332299013 Ccl2/Adam8/Cxcl16 3
BP GO:0002430 complement receptor mediated signaling pathway 2/49 13/28564 0.000222161268682844 0.00268800422439441 0.00134272443323824 C5ar1/C3ar1 2
BP GO:1901224 positive regulation of NIK/NF-kappaB signaling 3/49 69/28564 0.00022952006246601 0.002758770750825 0.00137807405926614 Cd14/Tlr2/Tnf 3
BP GO:1903034 regulation of response to wounding 4/49 177/28564 0.00024288772380184 0.00290036517245727 0.00144880396653729 Ccl2/Tnf/Plaur/Cd9 4
BP GO:0022409 positive regulation of cell-cell adhesion 5/49 330/28564 0.000250980166694912 0.00297495532453616 0.00148606358791971 Ccl2/Tnf/Adam8/Plaur/Lgals1 5
BP GO:0001660 fever generation 2/49 14/28564 0.000258904157964559 0.00297495532453616 0.00148606358791971 Tnf/Il1rn 2
BP GO:0032494 response to peptidoglycan 2/49 14/28564 0.000258904157964559 0.00297495532453616 0.00148606358791971 C5ar1/Tlr2 2
BP GO:0098883 synapse pruning 2/49 14/28564 0.000258904157964559 0.00297495532453616 0.00148606358791971 C1qa/C1qb 2
BP GO:1903977 positive regulation of glial cell migration 2/49 14/28564 0.000258904157964559 0.00297495532453616 0.00148606358791971 P2ry12/Csf1 2
BP GO:2000343 positive regulation of chemokine (C-X-C motif) ligand 2 production 2/49 14/28564 0.000258904157964559 0.00297495532453616 0.00148606358791971 Tnf/Lpl 2
BP GO:0007596 blood coagulation 4/49 183/28564 0.000275761606904695 0.00314885284884298 0.00157292969201559 P2ry12/Plek/Plaur/Cd9 4
BP GO:0007599 hemostasis 4/49 186/28564 0.000293344523251345 0.00330827434555684 0.00165256466315085 P2ry12/Plek/Plaur/Cd9 4
BP GO:0050817 coagulation 4/49 186/28564 0.000293344523251345 0.00330827434555684 0.00165256466315085 P2ry12/Plek/Plaur/Cd9 4
BP GO:0010889 regulation of sequestering of triglyceride 2/49 15/28564 0.000298408283048095 0.00332434105566384 0.00166059038127534 Lpl/Plin2 2
BP GO:2001046 positive regulation of integrin-mediated signaling pathway 2/49 15/28564 0.000298408283048095 0.00332434105566384 0.00166059038127534 Cd63/Dab2 2
BP GO:0032677 regulation of interleukin-8 production 3/49 76/28564 0.000305375092170699 0.00336096562286667 0.0016788852562587 Cd14/Tlr2/Tnf 3
BP GO:0061045 negative regulation of wound healing 3/49 76/28564 0.000305375092170699 0.00336096562286667 0.0016788852562587 Tnf/Plaur/Cd9 3
BP GO:0032637 interleukin-8 production 3/49 77/28564 0.000317372840353368 0.00347209688218925 0.0017343980623156 Cd14/Tlr2/Tnf 3
BP GO:0002437 inflammatory response to antigenic stimulus 3/49 78/28564 0.000329670638233979 0.00358516819079452 0.00179087997085752 Tnf/Fcgr3/Il1rn 3
BP GO:0034112 positive regulation of homotypic cell-cell adhesion 2/49 16/28564 0.000340664450632058 0.00363973070938462 0.0018181352951554 Plaur/Lgals1 2
BP GO:0051044 positive regulation of membrane protein ectodomain proteolysis 2/49 16/28564 0.000340664450632058 0.00363973070938462 0.0018181352951554 Tnf/Adam8 2
BP GO:2000833 positive regulation of steroid hormone secretion 2/49 16/28564 0.000340664450632058 0.00363973070938462 0.0018181352951554 Spp1/Dab2 2
BP GO:1902075 cellular response to salt 4/49 197/28564 0.000364742266636838 0.00386816001339731 0.00193224136871804 P2ry12/Mt1/Alox5ap/Lgmn 4
BP GO:0010921 regulation of phosphatase activity 3/49 81/28564 0.000368396191752124 0.00386816001339731 0.00193224136871804 Tnf/Plek/Rcan1 3
BP GO:0045123 cellular extravasation 3/49 81/28564 0.000368396191752124 0.00386816001339731 0.00193224136871804 Ccl2/Tnf/Adam8 3
BP GO:0043524 negative regulation of neuron apoptotic process 4/49 199/28564 0.000378946464485665 0.00395620108923034 0.00197622005840043 C5ar1/Adam8/Mt1/Lgmn 4
BP GO:0050890 cognition 5/49 364/28564 0.000393464517676331 0.00408442996474236 0.00204027354560633 C5ar1/Tlr2/Il1rn/Lgmn/Rcan1 5
BP GO:0032722 positive regulation of chemokine production 3/49 83/28564 0.000395771576250186 0.00408516762604006 0.0020406420256254 Tlr2/Tnf/Lpl 3
BP GO:1905475 regulation of protein localization to membrane 4/49 205/28564 0.00042393436011192 0.00435128132541841 0.00217357238448867 Ccl2/Tnf/Lgals3/Dab2 4
BP GO:0033623 regulation of integrin activation 2/49 18/28564 0.000433396251558627 0.00441464329878696 0.00220522325356396 P2ry12/Plek 2
BP GO:0032729 positive regulation of type II interferon production 3/49 86/28564 0.000439234475125667 0.00441464329878696 0.00220522325356396 Cd14/Tnf/Irf8 3
BP GO:0002460 adaptive immune response based on somatic recombination of immune receptors built from immunoglobulin superfamily domains 5/49 373/28564 0.000439772895664601 0.00441464329878696 0.00220522325356396 Tnf/Fcgr3/C3ar1/C1qa/C1qb 5
BP GO:0045860 positive regulation of protein kinase activity 5/49 373/28564 0.000439772895664601 0.00441464329878696 0.00220522325356396 Tnf/Adam8/Il1rn/Sdc4/Csf1 5
BP GO:0031334 positive regulation of protein-containing complex assembly 4/49 208/28564 0.000447803095527658 0.00447068992092367 0.00223321992420178 P2ry12/Tnf/Plek/Lgals3 4
BP GO:0001820 serotonin secretion 2/49 19/28564 0.000483853609620586 0.00477838132311789 0.00238691937149956 Fcgr3/Lgals3 2
BP GO:0006590 thyroid hormone generation 2/49 19/28564 0.000483853609620586 0.00477838132311789 0.00238691937149956 Ctsl/Ctsb 2
BP GO:0045862 positive regulation of proteolysis 5/49 384/28564 0.000501834622098955 0.00490295109398284 0.0024491450456504 Tnf/Adam8/Ctsl/Dab2/Lgmn 5
BP GO:0050863 regulation of T cell activation 5/49 384/28564 0.000501834622098955 0.00490295109398284 0.0024491450456504 Ccl2/Lgals3/Adam8/Sdc4/Lgals1 5
BP GO:0050766 positive regulation of phagocytosis 3/49 91/28564 0.00051827601738221 0.00503665044551755 0.00251593117060681 Ccl2/Tnf/Fcgr3 3
BP GO:1903532 positive regulation of secretion by cell 5/49 389/28564 0.000532131887046811 0.0051368970762184 0.00256600683610253 Spp1/Tlr2/Lgals3/Sdc4/Dab2 5
BP GO:0048143 astrocyte activation 2/49 20/28564 0.000537026459528032 0.0051368970762184 0.00256600683610253 C5ar1/C1qa 2
BP GO:0051956 negative regulation of amino acid transport 2/49 20/28564 0.000537026459528032 0.0051368970762184 0.00256600683610253 Tnf/Il1rn 2
BP GO:0032496 response to lipopolysaccharide 5/49 394/28564 0.000563787708930275 0.00536479241778965 0.00267984618225081 Ccl2/Cd14/Tnf/Irf8/Cxcl16 5
BP GO:1903035 negative regulation of response to wounding 3/49 94/28564 0.000569795022622071 0.00539386272710115 0.00269436751902555 Tnf/Plaur/Cd9 3
BP GO:0002863 positive regulation of inflammatory response to antigenic stimulus 2/49 21/28564 0.000592905719020763 0.00558370488995326 0.00278919836348888 Tnf/Fcgr3 2
BP GO:1901222 regulation of NIK/NF-kappaB signaling 3/49 98/28564 0.000643427910454141 0.00598119705068072 0.00298775550539578 Cd14/Tlr2/Tnf 3
BP GO:0007252 I-kappaB phosphorylation 2/49 22/28564 0.000651482327906657 0.00598119705068072 0.00298775550539578 Tlr2/Tnf 2
BP GO:0010885 regulation of cholesterol storage 2/49 22/28564 0.000651482327906657 0.00598119705068072 0.00298775550539578 Msr1/Lpl 2
BP GO:0051770 positive regulation of nitric-oxide synthase biosynthetic process 2/49 22/28564 0.000651482327906657 0.00598119705068072 0.00298775550539578 Ccl2/Tlr2 2
BP GO:0090026 positive regulation of monocyte chemotaxis 2/49 22/28564 0.000651482327906657 0.00598119705068072 0.00298775550539578 Ccl2/Lgmn 2
BP GO:0002693 positive regulation of cellular extravasation 2/49 23/28564 0.000712747248015166 0.00638016482451903 0.00318704975246046 Ccl2/Adam8 2
BP GO:0031649 heat generation 2/49 23/28564 0.000712747248015166 0.00638016482451903 0.00318704975246046 Tnf/Il1rn 2
BP GO:0051043 regulation of membrane protein ectodomain proteolysis 2/49 23/28564 0.000712747248015166 0.00638016482451903 0.00318704975246046 Tnf/Adam8 2
BP GO:2001044 regulation of integrin-mediated signaling pathway 2/49 23/28564 0.000712747248015166 0.00638016482451903 0.00318704975246046 Cd63/Dab2 2
BP GO:0007160 cell-matrix adhesion 4/49 236/28564 0.000719005118444817 0.00638016482451903 0.00318704975246046 Adam8/Sdc4/Cd63/Csf1 4
BP GO:0048545 response to steroid hormone 4/49 236/28564 0.000719005118444817 0.00638016482451903 0.00318704975246046 Spp1/Tnf/Il1rn/Dab2 4
BP GO:0007229 integrin-mediated signaling pathway 3/49 102/28564 0.000722875817556343 0.00638016482451903 0.00318704975246046 Plek/Cd63/Dab2 3
BP GO:0030168 platelet activation 3/49 102/28564 0.000722875817556343 0.00638016482451903 0.00318704975246046 P2ry12/Plek/Cd9 3
BP GO:2001237 negative regulation of extrinsic apoptotic signaling pathway 3/49 103/28564 0.000743667528541865 0.00653211814733648 0.00326295418646658 Tnf/Lgals3/Dab2 3
BP GO:0046330 positive regulation of JNK cascade 3/49 104/28564 0.000764836686604024 0.00668591687284953 0.00333978044465217 Tnf/Dab2/Gadd45b 3
BP GO:0010878 cholesterol storage 2/49 24/28564 0.000776691463150893 0.00672519101031603 0.00335939884535707 Msr1/Lpl 2
BP GO:0046697 decidualization 2/49 24/28564 0.000776691463150893 0.00672519101031603 0.00335939884535707 Ctsl/Ctsb 2
BP GO:2001233 regulation of apoptotic signaling pathway 5/49 424/28564 0.000784468966425628 0.00676049434745105 0.00337703373332185 Tnf/Lgals3/Plaur/Ctsl/Dab2 5
BP GO:0050678 regulation of epithelial cell proliferation 5/49 427/28564 0.000809638804992583 0.00694464834141525 0.00346902319707719 Ccl2/C5ar1/Tnf/Ctsl/Dab2 5
BP GO:0050867 positive regulation of cell activation 5/49 430/28564 0.000835408179553969 0.00706752304458415 0.00353040214309017 Ccl2/Tnf/Plek/Adam8/Lgals1 5
BP GO:0042445 hormone metabolic process 4/49 246/28564 0.000839138069389639 0.00706752304458415 0.00353040214309017 Spp1/Ctsl/Ctsb/Dab2 4
BP GO:2001234 negative regulation of apoptotic signaling pathway 4/49 246/28564 0.000839138069389639 0.00706752304458415 0.00353040214309017 Tnf/Lgals3/Plaur/Dab2 4
BP GO:0032288 myelin assembly 2/49 25/28564 0.000843305979047261 0.00706752304458415 0.00353040214309017 Tlr2/Cd9 2
BP GO:0034114 regulation of heterotypic cell-cell adhesion 2/49 25/28564 0.000843305979047261 0.00706752304458415 0.00353040214309017 Tnf/Il1rn 2
BP GO:0030100 regulation of endocytosis 4/49 248/28564 0.000864763408372858 0.00721425911916534 0.00360370043287319 Cd14/Lgals3/Cd63/Dab2 4
BP GO:0032755 positive regulation of interleukin-6 production 3/49 110/28564 0.000899930750986511 0.00747351582751071 0.00373320555552778 Tlr2/Tnf/Lpl 3
BP GO:0010575 positive regulation of vascular endothelial growth factor production 2/49 26/28564 0.00091258182332028 0.00747662327895135 0.00373475780419487 C5ar1/C3ar1 2
BP GO:0150146 cell junction disassembly 2/49 26/28564 0.00091258182332028 0.00747662327895135 0.00373475780419487 C1qa/C1qb 2
BP GO:1903975 regulation of glial cell migration 2/49 26/28564 0.00091258182332028 0.00747662327895135 0.00373475780419487 P2ry12/Csf1 2
BP GO:0032479 regulation of type I interferon production 3/49 111/28564 0.000923818059355529 0.00748384919283676 0.00373836732647105 Cd14/Tlr2/Irf8 3
BP GO:1905477 positive regulation of protein localization to membrane 3/49 111/28564 0.000923818059355529 0.00748384919283676 0.00373836732647105 Ccl2/Tnf/Lgals3 3
BP GO:0033674 positive regulation of kinase activity 5/49 440/28564 0.000925752554778932 0.00748384919283676 0.00373836732647105 Tnf/Adam8/Il1rn/Sdc4/Csf1 5
BP GO:0007200 phospholipase C-activating G protein-coupled receptor signaling pathway 3/49 112/28564 0.000948104339721021 0.00759730977486976 0.00379504368669495 C5ar1/P2ry12/C3ar1 3
BP GO:0032642 regulation of chemokine production 3/49 112/28564 0.000948104339721021 0.00759730977486976 0.00379504368669495 Tlr2/Tnf/Lpl 3
BP GO:0015844 monoamine transport 3/49 113/28564 0.000972792209871376 0.00771974185831198 0.00385620153323337 P2ry12/Fcgr3/Lgals3 3
BP GO:0002523 leukocyte migration involved in inflammatory response 2/49 27/28564 0.000984510045422382 0.00771974185831198 0.00385620153323337 Ccl2/Adam8 2
BP GO:0033622 integrin activation 2/49 27/28564 0.000984510045422382 0.00771974185831198 0.00385620153323337 P2ry12/Plek 2
BP GO:0072567 chemokine (C-X-C motif) ligand 2 production 2/49 27/28564 0.000984510045422382 0.00771974185831198 0.00385620153323337 Tnf/Lpl 2
BP GO:2000341 regulation of chemokine (C-X-C motif) ligand 2 production 2/49 27/28564 0.000984510045422382 0.00771974185831198 0.00385620153323337 Tnf/Lpl 2
BP GO:0043547 positive regulation of GTPase activity 4/49 259/28564 0.0010156721960266 0.00793005599205381 0.00396125863227647 Ccl2/Ccl4/Ccl9/Ccl3 4
BP GO:0032606 type I interferon production 3/49 116/28564 0.00104929129721301 0.0081231152542719 0.00405769649725102 Cd14/Tlr2/Irf8 3
BP GO:1904659 glucose transmembrane transport 3/49 116/28564 0.00104929129721301 0.0081231152542719 0.00405769649725102 Tnf/Hk2/Slc2a5 3
BP GO:0051047 positive regulation of secretion 5/49 453/28564 0.00105386735057628 0.00812411666456906 0.00405819672640301 Spp1/Tlr2/Lgals3/Sdc4/Dab2 5
BP GO:0045780 positive regulation of bone resorption 2/49 28/28564 0.00105908171659638 0.00813000964798985 0.00406114041702371 Spp1/Adam8 2
BP GO:0008645 hexose transmembrane transport 3/49 117/28564 0.00107561138516185 0.00818809166954461 0.00409015381989179 Tnf/Hk2/Slc2a5 3
BP GO:1903076 regulation of protein localization to plasma membrane 3/49 117/28564 0.00107561138516185 0.00818809166954461 0.00409015381989179 Tnf/Lgals3/Dab2 3
BP GO:0038061 NIK/NF-kappaB signaling 3/49 119/28564 0.00112949740298834 0.00847346141958549 0.00423270305118003 Cd14/Tlr2/Tnf 3
BP GO:0010893 positive regulation of steroid biosynthetic process 2/49 29/28564 0.00113628792982947 0.00847346141958549 0.00423270305118003 Tnf/Dab2 2
BP GO:0051767 nitric-oxide synthase biosynthetic process 2/49 29/28564 0.00113628792982947 0.00847346141958549 0.00423270305118003 Ccl2/Tlr2 2
BP GO:0051769 regulation of nitric-oxide synthase biosynthetic process 2/49 29/28564 0.00113628792982947 0.00847346141958549 0.00423270305118003 Ccl2/Tlr2 2
BP GO:2000831 regulation of steroid hormone secretion 2/49 29/28564 0.00113628792982947 0.00847346141958549 0.00423270305118003 Spp1/Dab2 2
BP GO:0015749 monosaccharide transmembrane transport 3/49 120/28564 0.00115706836236104 0.00855855829163406 0.00427521103842752 Tnf/Hk2/Slc2a5 3
BP GO:0051897 positive regulation of protein kinase B signaling 3/49 120/28564 0.00115706836236104 0.00855855829163406 0.00427521103842752 P2ry12/Tnf/Adam8 3
BP GO:0032602 chemokine production 3/49 121/28564 0.00118506128229169 0.00869520868573058 0.00434347128195685 Tlr2/Tnf/Lpl 3
BP GO:0032963 collagen metabolic process 3/49 121/28564 0.00118506128229169 0.00869520868573058 0.00434347128195685 Ccl2/Ctsl/Ctsb 3
BP GO:0052547 regulation of peptidase activity 5/49 466/28564 0.00119473948117246 0.00873115612840836 0.00436142791653274 Tnf/Plaur/Ctsl/Ctsb/Lgmn 5
BP GO:0006929 substrate-dependent cell migration 2/49 30/28564 0.00121611979980738 0.00874744438680346 0.00436956430349356 P2ry12/Adam8 2
BP GO:0032891 negative regulation of organic acid transport 2/49 30/28564 0.00121611979980738 0.00874744438680346 0.00436956430349356 Tnf/Il1rn 2
BP GO:0090023 positive regulation of neutrophil chemotaxis 2/49 30/28564 0.00121611979980738 0.00874744438680346 0.00436956430349356 C5ar1/C3ar1 2
BP GO:0090025 regulation of monocyte chemotaxis 2/49 30/28564 0.00121611979980738 0.00874744438680346 0.00436956430349356 Ccl2/Lgmn 2
BP GO:0051952 regulation of amine transport 3/49 123/28564 0.00124232289114647 0.00890087812597883 0.0044462082419979 P2ry12/Tnf/Il1rn 3
BP GO:0002697 regulation of immune effector process 5/49 472/28564 0.00126427263916203 0.00902275824901966 0.00450709037069688 Ccl2/Tlr2/Tnf/Fcgr3/Lgals3 5
BP GO:0045445 myoblast differentiation 3/49 124/28564 0.00127159648498447 0.00903971508975342 0.0045155607310323 Ccl9/Tnf/Lgals1 3
BP GO:0006691 leukotriene metabolic process 2/49 31/28564 0.00129856846286853 0.00914414799498558 0.00456772754394751 Tlr2/Alox5ap 2
BP GO:0006837 serotonin transport 2/49 31/28564 0.00129856846286853 0.00914414799498558 0.00456772754394751 Fcgr3/Lgals3 2
BP GO:0032649 regulation of type II interferon production 3/49 125/28564 0.00130130184931377 0.00914414799498558 0.00456772754394751 Cd14/Tnf/Irf8 3
BP GO:1903039 positive regulation of leukocyte cell-cell adhesion 4/49 278/28564 0.0013185347595597 0.00922974331691787 0.00461048451921055 Ccl2/Tnf/Adam8/Lgals1 4
BP GO:0030098 lymphocyte differentiation 5/49 478/28564 0.00133676360542519 0.00932163017981614 0.00465638427442203 Adam8/Ctsl/Irf8/Mafb/Lgals1 5
BP GO:0110053 regulation of actin filament organization 4/49 280/28564 0.0013537061502155 0.009403882648075 0.00469747141179444 Tlr2/Plek/Capg/Sdc4 4
BP GO:0045662 negative regulation of myoblast differentiation 2/49 32/28564 0.00138362507695836 0.00953918119095443 0.0047650563722856 Ccl9/Tnf 2
BP GO:0071624 positive regulation of granulocyte chemotaxis 2/49 32/28564 0.00138362507695836 0.00953918119095443 0.0047650563722856 C5ar1/C3ar1 2
BP GO:0035303 regulation of dephosphorylation 3/49 128/28564 0.00139303262824118 0.00956793463081445 0.00477941942495096 Tnf/Plek/Rcan1 3
BP GO:0015837 amine transport 3/49 129/28564 0.00142448906119219 0.00967487551969565 0.00483283903758023 P2ry12/Tnf/Il1rn 3
BP GO:0021782 glial cell development 3/49 129/28564 0.00142448906119219 0.00967487551969565 0.00483283903758023 C5ar1/Tlr2/C1qa 3
BP GO:0034219 carbohydrate transmembrane transport 3/49 129/28564 0.00142448906119219 0.00967487551969565 0.00483283903758023 Tnf/Hk2/Slc2a5 3
BP GO:0016485 protein processing 4/49 286/28564 0.00146315635118009 0.00990069130965195 0.00494563959638651 Srgn/Plaur/Mafb/Lgmn 4
BP GO:1901889 negative regulation of cell junction assembly 2/49 33/28564 0.00147128082158371 0.00991893011451452 0.00495475032943513 Tlr2/Tnf 2
BP GO:0043406 positive regulation of MAP kinase activity 3/49 132/28564 0.00152152982270123 0.0102199815664527 0.00510513295774753 Tnf/Adam8/Il1rn 3
BP GO:0043244 regulation of protein-containing complex disassembly 3/49 133/28564 0.00155477497373145 0.0102622649000748 0.00512625452618031 Tnf/Plek/Capg 3
BP GO:0045807 positive regulation of endocytosis 3/49 133/28564 0.00155477497373145 0.0102622649000748 0.00512625452618031 Cd14/Cd63/Dab2 3
BP GO:1901216 positive regulation of neuron death 3/49 133/28564 0.00155477497373145 0.0102622649000748 0.00512625452618031 Ccl3/Tnf/C1qa 3
BP GO:0002313 mature B cell differentiation involved in immune response 2/49 34/28564 0.00156152689776727 0.0102622649000748 0.00512625452618031 Irf8/Lgals1 2
BP GO:0035929 steroid hormone secretion 2/49 34/28564 0.00156152689776727 0.0102622649000748 0.00512625452618031 Spp1/Dab2 2
BP GO:0071404 cellular response to low-density lipoprotein particle stimulus 2/49 34/28564 0.00156152689776727 0.0102622649000748 0.00512625452618031 Lpl/Cd9 2
BP GO:2000027 regulation of animal organ morphogenesis 3/49 134/28564 0.00158847307404584 0.010401936581655 0.00519602397735425 Tnf/Csf1/Dab2 3
BP GO:0019932 second-messenger-mediated signaling 4/49 295/28564 0.00163871026386813 0.0106802322355474 0.00533503952307182 P2ry12/Tnf/Mt1/Rcan1 4
BP GO:0001893 maternal placenta development 2/49 35/28564 0.00165435452800214 0.0106802322355474 0.00533503952307182 Ctsl/Ctsb 2
BP GO:0002092 positive regulation of receptor internalization 2/49 35/28564 0.00165435452800214 0.0106802322355474 0.00533503952307182 Cd63/Dab2 2
BP GO:0055094 response to lipoprotein particle 2/49 35/28564 0.00165435452800214 0.0106802322355474 0.00533503952307182 Lpl/Cd9 2
BP GO:0032874 positive regulation of stress-activated MAPK cascade 3/49 137/28564 0.00169230777693109 0.0108867827762433 0.00543821661452652 Tnf/Dab2/Gadd45b 3
BP GO:0006959 humoral immune response 4/49 299/28564 0.00172124959513897 0.0110341158256803 0.00551181310797963 Tnf/Lgals3/C1qa/C1qb 4
BP GO:0006958 complement activation	classical pathway 2/49 36/28564 0.00174975495620651 0.0111776304370255 0.00558350219739067 C1qa/C1qb 2
BP GO:0032609 type II interferon production 3/49 139/28564 0.00176383702784913 0.0111893411454179 0.00558935198517982 Cd14/Tnf/Irf8 3
BP GO:0070304 positive regulation of stress-activated protein kinase signaling cascade 3/49 139/28564 0.00176383702784913 0.0111893411454179 0.00558935198517982 Tnf/Dab2/Gadd45b 3
BP GO:0042403 thyroid hormone metabolic process 2/49 37/28564 0.00184771944767834 0.011600630346764 0.00579480108930048 Ctsl/Ctsb 2
BP GO:0043243 positive regulation of protein-containing complex disassembly 2/49 37/28564 0.00184771944767834 0.011600630346764 0.00579480108930048 Tnf/Plek 2
BP GO:0070542 response to fatty acid 2/49 37/28564 0.00184771944767834 0.011600630346764 0.00579480108930048 Tlr2/Lpl 2
BP GO:0045089 positive regulation of innate immune response 4/49 306/28564 0.00187258542259264 0.011716484818756 0.00585267325662515 Cd14/Tlr2/Tnf/Adam8 4
BP GO:0071402 cellular response to lipoprotein particle stimulus 2/49 38/28564 0.0019482392890502 0.0121069155819548 0.00604770305623532 Lpl/Cd9 2
BP GO:0090022 regulation of neutrophil chemotaxis 2/49 38/28564 0.0019482392890502 0.0121069155819548 0.00604770305623532 C5ar1/C3ar1 2
BP GO:0002703 regulation of leukocyte mediated immunity 4/49 310/28564 0.00196308916695752 0.0121578437560386 0.00607314293577938 Ccl2/Tlr2/Tnf/Fcgr3 4
BP GO:0014002 astrocyte development 2/49 39/28564 0.00205130578824422 0.0125762942118195 0.00628216926318524 C5ar1/C1qa 2
BP GO:0030866 cortical actin cytoskeleton organization 2/49 39/28564 0.00205130578824422 0.0125762942118195 0.00628216926318524 Tnf/Plek 2
BP GO:0045940 positive regulation of steroid metabolic process 2/49 39/28564 0.00205130578824422 0.0125762942118195 0.00628216926318524 Tnf/Dab2 2
BP GO:0002366 leukocyte activation involved in immune response 4/49 317/28564 0.00212870015647026 0.0130071410898701 0.00649738790938116 Tnf/Lgals3/Irf8/Lgals1 4
BP GO:1904375 regulation of protein localization to cell periphery 3/49 149/28564 0.00214981254796475 0.0130919437587315 0.00653974893487752 Tnf/Lgals3/Dab2 3
BP GO:0030574 collagen catabolic process 2/49 40/28564 0.00215691027442702 0.0130919437587315 0.00653974893487752 Ctsl/Ctsb 2
BP GO:0002263 cell activation involved in immune response 4/49 321/28564 0.00222755319670243 0.0134187891312869 0.00670301626297108 Tnf/Lgals3/Irf8/Lgals1 4
BP GO:0031623 receptor internalization 3/49 151/28564 0.00223279249913039 0.0134187891312869 0.00670301626297108 Cd63/Cd9/Dab2 3
BP GO:1903038 negative regulation of leukocyte cell-cell adhesion 3/49 151/28564 0.00223279249913039 0.0134187891312869 0.00670301626297108 Lgals3/Adam8/Sdc4 3
BP GO:0002861 regulation of inflammatory response to antigenic stimulus 2/49 41/28564 0.00226504409796483 0.0135389569867119 0.00676304307174789 Tnf/Fcgr3 2
BP GO:0019233 sensory perception of pain 3/49 152/28564 0.00227501904483884 0.0135389569867119 0.00676304307174789 Ccl2/Tnf/Il1rn 3
BP GO:0046328 regulation of JNK cascade 3/49 152/28564 0.00227501904483884 0.0135389569867119 0.00676304307174789 Tnf/Dab2/Gadd45b 3
BP GO:0007611 learning or memory 4/49 326/28564 0.00235552811979399 0.0139467954815867 0.00696676846284429 Tlr2/Il1rn/Lgmn/Rcan1 4
BP GO:0060759 regulation of response to cytokine stimulus 3/49 154/28564 0.00236095536939138 0.0139467954815867 0.00696676846284429 Tlr2/Il1rn/Csf1 3
BP GO:0070884 regulation of calcineurin-NFAT signaling cascade 2/49 42/28564 0.00237569863037864 0.0139467954815867 0.00696676846284429 Tnf/Rcan1 2
BP GO:0002699 positive regulation of immune effector process 4/49 327/28564 0.00238171876861251 0.0139467954815867 0.00696676846284429 Ccl2/Tlr2/Tnf/Fcgr3 4
BP GO:0010631 epithelial cell migration 4/49 327/28564 0.00238171876861251 0.0139467954815867 0.00696676846284429 Tnf/Adam8/Cd63/Lgmn 4
BP GO:0008643 carbohydrate transport 3/49 155/28564 0.00240466914358456 0.0140361997614345 0.0070114281065674 Tnf/Hk2/Slc2a5 3
BP GO:0090132 epithelium migration 4/49 329/28564 0.00243470198928245 0.014166243740188 0.00707638828262784 Tnf/Adam8/Cd63/Lgmn 4
BP GO:0090130 tissue migration 4/49 331/28564 0.00248849297570303 0.0142544101500789 0.00712042957976456 Tnf/Adam8/Cd63/Lgmn 4
BP GO:0002335 mature B cell differentiation 2/49 43/28564 0.00248886526429948 0.0142544101500789 0.00712042957976456 Irf8/Lgals1 2
BP GO:0006953 acute-phase response 2/49 43/28564 0.00248886526429948 0.0142544101500789 0.00712042957976456 Tnf/Il1rn 2
BP GO:0032735 positive regulation of interleukin-12 production 2/49 43/28564 0.00248886526429948 0.0142544101500789 0.00712042957976456 Tlr2/Irf8 2
BP GO:0106056 regulation of calcineurin-mediated signaling 2/49 43/28564 0.00248886526429948 0.0142544101500789 0.00712042957976456 Tnf/Rcan1 2
BP GO:0051092 positive regulation of NF-kappaB transcription factor activity 3/49 158/28564 0.00253881659512916 0.0144950559978156 0.00724063811834534 Tlr2/Tnf/Adam8 3
BP GO:0002833 positive regulation of response to biotic stimulus 4/49 335/28564 0.00259852315146519 0.0147897252265636 0.00738783266870084 Cd14/Tlr2/Tnf/Adam8 4
BP GO:0006509 membrane protein ectodomain proteolysis 2/49 45/28564 0.00272270051246861 0.0154122244593603 0.00769878639487532 Tnf/Adam8 2
BP GO:0007613 memory 3/49 162/28564 0.00272476655740195 0.0154122244593603 0.00769878639487532 Il1rn/Lgmn/Rcan1 3
BP GO:1902074 response to salt 4/49 340/28564 0.00274071522106952 0.0154545886076976 0.00771994833225234 P2ry12/Mt1/Alox5ap/Lgmn 4
BP GO:0008064 regulation of actin polymerization or depolymerization 3/49 164/28564 0.00282081298332978 0.0158573086785954 0.00792111694428152 Tlr2/Plek/Capg 3
BP GO:0002691 regulation of cellular extravasation 2/49 47/28564 0.00296648140402606 0.0165363768550458 0.00826032825357917 Ccl2/Adam8 2
BP GO:0008037 cell recognition 3/49 167/28564 0.00296876387983307 0.0165363768550458 0.00826032825357917 Fcgr3/Lgals3/Cd9 3
BP GO:0030832 regulation of actin filament length 3/49 167/28564 0.00296876387983307 0.0165363768550458 0.00826032825357917 Tlr2/Plek/Capg 3
BP GO:0050680 negative regulation of epithelial cell proliferation 3/49 168/28564 0.00301912317164007 0.0167657691020864 0.00837491534094367 Tnf/Ctsl/Dab2 3
BP GO:2001236 regulation of extrinsic apoptotic signaling pathway 3/49 169/28564 0.0030700066396617 0.016996673123218 0.00849025759676776 Tnf/Lgals3/Dab2 3
BP GO:0033173 calcineurin-NFAT signaling cascade 2/49 48/28564 0.00309208017067707 0.0170671615463052 0.00852546830331379 Tnf/Rcan1 2
BP GO:0032675 regulation of interleukin-6 production 3/49 170/28564 0.00312141607193413 0.0171771902512761 0.00858043035626788 Tlr2/Tnf/Lpl 3
BP GO:0043087 regulation of GTPase activity 4/49 353/28564 0.00313527761997863 0.0172016582933963 0.00859265274702537 Ccl2/Ccl4/Ccl9/Ccl3 4
BP GO:0050878 regulation of body fluid levels 4/49 354/28564 0.00316714997374925 0.017272785080716 0.00862818233225639 P2ry12/Plek/Plaur/Cd9 4
BP GO:0071900 regulation of protein serine/threonine kinase activity 4/49 354/28564 0.00316714997374925 0.017272785080716 0.00862818233225639 Tnf/Adam8/Il1rn/Dab2 4
BP GO:0010543 regulation of platelet activation 2/49 49/28564 0.00322013983543698 0.0174059037850396 0.00869467840960407 Plek/Cd9 2
BP GO:0062208 positive regulation of pattern recognition receptor signaling pathway 2/49 49/28564 0.00322013983543698 0.0174059037850396 0.00869467840960407 Cd14/Tlr2 2
BP GO:1900077 negative regulation of cellular response to insulin stimulus 2/49 49/28564 0.00322013983543698 0.0174059037850396 0.00869467840960407 Tnf/Lpl 2
BP GO:0030865 cortical cytoskeleton organization 2/49 50/28564 0.00335065193746141 0.0178995353501228 0.00894125955610663 Tnf/Plek 2
BP GO:0045429 positive regulation of nitric oxide biosynthetic process 2/49 50/28564 0.00335065193746141 0.0178995353501228 0.00894125955610663 Tlr2/Tnf 2
BP GO:0060135 maternal process involved in female pregnancy 2/49 50/28564 0.00335065193746141 0.0178995353501228 0.00894125955610663 Ctsl/Ctsb 2
BP GO:0070232 regulation of T cell apoptotic process 2/49 50/28564 0.00335065193746141 0.0178995353501228 0.00894125955610663 Lgals3/Adam8 2
BP GO:0032956 regulation of actin cytoskeleton organization 4/49 362/28564 0.00343015295346415 0.0181697599851693 0.00907624342876835 Tlr2/Plek/Capg/Sdc4 4
BP GO:0050830 defense response to Gram-positive bacterium 3/49 176/28564 0.00344101639565877 0.0181697599851693 0.00907624342876835 C5ar1/Tlr2/Tnf 3
BP GO:0051896 regulation of protein kinase B signaling 3/49 176/28564 0.00344101639565877 0.0181697599851693 0.00907624342876835 P2ry12/Tnf/Adam8 3
BP GO:0071248 cellular response to metal ion 3/49 176/28564 0.00344101639565877 0.0181697599851693 0.00907624342876835 Mt1/Alox5ap/Lgmn 3
BP GO:0030195 negative regulation of blood coagulation 2/49 51/28564 0.00348360803666114 0.0183416480777519 0.00916210577213775 Plaur/Cd9 2
BP GO:0007254 JNK cascade 3/49 179/28564 0.00360805791435264 0.0187306302460437 0.00935641196284961 Tnf/Dab2/Gadd45b 3
BP GO:0019722 calcium-mediated signaling 3/49 179/28564 0.00360805791435264 0.0187306302460437 0.00935641196284961 P2ry12/Tnf/Rcan1 3
BP GO:0032635 interleukin-6 production 3/49 179/28564 0.00360805791435264 0.0187306302460437 0.00935641196284961 Tlr2/Tnf/Lpl 3
BP GO:0097720 calcineurin-mediated signaling 2/49 52/28564 0.00361899971365815 0.0187306302460437 0.00935641196284961 Tnf/Rcan1 2
BP GO:1900047 negative regulation of hemostasis 2/49 52/28564 0.00361899971365815 0.0187306302460437 0.00935641196284961 Plaur/Cd9 2
BP GO:1904407 positive regulation of nitric oxide metabolic process 2/49 52/28564 0.00361899971365815 0.0187306302460437 0.00935641196284961 Tlr2/Tnf 2
BP GO:0042552 myelination 3/49 180/28564 0.00366482246425608 0.0189142108536606 0.00944811500597687 Tlr2/Tnf/Cd9 3
BP GO:0051604 protein maturation 4/49 371/28564 0.00374342603376854 0.0191723673936262 0.00957707056738046 Srgn/Plaur/Mafb/Lgmn 4
BP GO:0043666 regulation of phosphoprotein phosphatase activity 2/49 53/28564 0.00375681856974175 0.0191723673936262 0.00957707056738046 Tnf/Rcan1 2
BP GO:0050819 negative regulation of coagulation 2/49 53/28564 0.00375681856974175 0.0191723673936262 0.00957707056738046 Plaur/Cd9 2
BP GO:1902930 regulation of alcohol biosynthetic process 2/49 53/28564 0.00375681856974175 0.0191723673936262 0.00957707056738046 Plek/Dab2 2
BP GO:0002449 lymphocyte mediated immunity 4/49 372/28564 0.00377939334196815 0.0192338485676207 0.00960778193076203 Tnf/Fcgr3/C1qa/C1qb 4
BP GO:0007272 ensheathment of neurons 3/49 183/28564 0.00383839129045149 0.0194258750350551 0.0097037038892592 Tlr2/Tnf/Cd9 3
BP GO:0008366 axon ensheathment 3/49 183/28564 0.00383839129045149 0.0194258750350551 0.0097037038892592 Tlr2/Tnf/Cd9 3
BP GO:0002714 positive regulation of B cell mediated immunity 2/49 54/28564 0.00389705622682476 0.0195602245231012 0.00977081477344438 Tnf/Fcgr3 2
BP GO:0002891 positive regulation of immunoglobulin mediated immune response 2/49 54/28564 0.00389705622682476 0.0195602245231012 0.00977081477344438 Tnf/Fcgr3 2
BP GO:0045124 regulation of bone resorption 2/49 54/28564 0.00389705622682476 0.0195602245231012 0.00977081477344438 Spp1/Adam8 2
BP GO:0030834 regulation of actin filament depolymerization 2/49 55/28564 0.0040397043273998 0.0202206570031765 0.0101007170925901 Plek/Capg 2
BP GO:0002221 pattern recognition receptor signaling pathway 3/49 189/28564 0.00420041171024195 0.0209676289470275 0.0104738480091452 Cd14/Tlr2/Tnf 3
BP GO:0045088 regulation of innate immune response 4/49 385/28564 0.00426857702676808 0.0211629056612162 0.0105713935460919 Cd14/Tlr2/Tnf/Adam8 4
BP GO:0042742 defense response to bacterium 4/49 386/28564 0.0043078941371546 0.0211629056612162 0.0105713935460919 C5ar1/Tlr2/Tnf/Irf8 4
BP GO:0030225 macrophage differentiation 2/49 57/28564 0.00433219853163374 0.0211629056612162 0.0105713935460919 Tlr2/Csf1 2
BP GO:0034113 heterotypic cell-cell adhesion 2/49 57/28564 0.00433219853163374 0.0211629056612162 0.0105713935460919 Tnf/Il1rn 2
BP GO:0043507 positive regulation of JUN kinase activity 2/49 57/28564 0.00433219853163374 0.0211629056612162 0.0105713935460919 Tnf/Il1rn 2
BP GO:0044060 regulation of endocrine process 2/49 57/28564 0.00433219853163374 0.0211629056612162 0.0105713935460919 Spp1/Dab2 2
BP GO:0048016 inositol phosphate-mediated signaling 2/49 57/28564 0.00433219853163374 0.0211629056612162 0.0105713935460919 Tnf/Rcan1 2
BP GO:0051955 regulation of amino acid transport 2/49 57/28564 0.00433219853163374 0.0211629056612162 0.0105713935460919 Tnf/Il1rn 2
BP GO:0031529 ruffle organization 2/49 58/28564 0.00448202802278462 0.021720597341187 0.0108499743005843 P2ry12/Plek 2
BP GO:0033619 membrane protein proteolysis 2/49 58/28564 0.00448202802278462 0.021720597341187 0.0108499743005843 Tnf/Adam8 2
BP GO:0140895 cell surface toll-like receptor signaling pathway 2/49 58/28564 0.00448202802278462 0.021720597341187 0.0108499743005843 Cd14/Tlr2 2
BP GO:0002705 positive regulation of leukocyte mediated immunity 3/49 194/28564 0.00451745380468444 0.0218343600559748 0.010906801583574 Ccl2/Tnf/Fcgr3 3
BP GO:1902903 regulation of supramolecular fiber organization 4/49 394/28564 0.0046312995901084 0.0222224326928009 0.0111006534408771 Tlr2/Plek/Capg/Sdc4 4
BP GO:0030042 actin filament depolymerization 2/49 59/28564 0.00463423473232466 0.0222224326928009 0.0111006534408771 Plek/Capg 2
BP GO:0140353 lipid export from cell 2/49 59/28564 0.00463423473232466 0.0222224326928009 0.0111006534408771 Spp1/Dab2 2
BP GO:0008154 actin polymerization or depolymerization 3/49 197/28564 0.00471446528745563 0.0225479792674907 0.0112632719873906 Tlr2/Plek/Capg 3
BP GO:0006956 complement activation 2/49 60/28564 0.0047888104049927 0.0228437509397432 0.011411017235478 C1qa/C1qb 2
BP GO:0002758 innate immune response-activating signaling pathway 3/49 200/28564 0.00491661446698575 0.0233923297687056 0.0116850458960434 Cd14/Tlr2/Tnf 3
BP GO:0043405 regulation of MAP kinase activity 3/49 202/28564 0.00505425375158209 0.0239409452047295 0.0119590928427393 Tnf/Adam8/Il1rn 3
BP GO:0046879 hormone secretion 4/49 404/28564 0.00505813073290946 0.0239409452047295 0.0119590928427393 Spp1/Tnf/Il1rn/Dab2 4
BP GO:0032655 regulation of interleukin-12 production 2/49 62/28564 0.0051050357202214 0.0240653920095487 0.0120212570923163 Tlr2/Irf8 2
BP GO:0010952 positive regulation of peptidase activity 3/49 203/28564 0.00512393951380102 0.0240653920095487 0.0120212570923163 Tnf/Ctsl/Lgmn 3
BP GO:0032872 regulation of stress-activated MAPK cascade 3/49 203/28564 0.00512393951380102 0.0240653920095487 0.0120212570923163 Tnf/Dab2/Gadd45b 3
BP GO:0002696 positive regulation of leukocyte activation 4/49 408/28564 0.00523602977555053 0.0245287856408483 0.0122527336448106 Ccl2/Tnf/Adam8/Lgals1 4
BP GO:0002752 cell surface pattern recognition receptor signaling pathway 2/49 63/28564 0.0052666689536837 0.0245464392305615 0.0122615520484526 Cd14/Tlr2 2
BP GO:1903078 positive regulation of protein localization to plasma membrane 2/49 63/28564 0.0052666689536837 0.0245464392305615 0.0122615520484526 Tnf/Lgals3 2
BP GO:0070302 regulation of stress-activated protein kinase signaling cascade 3/49 206/28564 0.00533647764645098 0.0247455448225024 0.0123610102043094 Tnf/Dab2/Gadd45b 3
BP GO:0071902 positive regulation of protein serine/threonine kinase activity 3/49 206/28564 0.00533647764645098 0.0247455448225024 0.0123610102043094 Tnf/Adam8/Il1rn 3
BP GO:0032970 regulation of actin filament-based process 4/49 411/28564 0.00537218255753531 0.0248480443863722 0.0124122112655113 Tlr2/Plek/Capg/Sdc4 4
BP GO:0045732 positive regulation of protein catabolic process 3/49 207/28564 0.00540848845119821 0.0248666070991181 0.0124214837985397 Tnf/Adam8/Dab2 3
BP GO:0032615 interleukin-12 production 2/49 64/28564 0.00543063833199131 0.0248666070991181 0.0124214837985397 Tlr2/Irf8 2
BP GO:0046850 regulation of bone remodeling 2/49 64/28564 0.00543063833199131 0.0248666070991181 0.0124214837985397 Spp1/Adam8 2
BP GO:0048260 positive regulation of receptor-mediated endocytosis 2/49 64/28564 0.00543063833199131 0.0248666070991181 0.0124214837985397 Cd63/Dab2 2
BP GO:0009914 hormone transport 4/49 413/28564 0.00546426060234423 0.0249580103012073 0.0124671419532433 Spp1/Tnf/Il1rn/Dab2 4
BP GO:0043491 protein kinase B signaling 3/49 209/28564 0.00555426514184948 0.0253058414318179 0.0126408921852828 P2ry12/Tnf/Adam8 3
BP GO:0006911 phagocytosis	engulfment 2/49 65/28564 0.00559693570104903 0.0253108948658826 0.0126434165002853 Msr1/Fcgr3 2
BP GO:0031663 lipopolysaccharide-mediated signaling pathway 2/49 65/28564 0.00559693570104903 0.0253108948658826 0.0126434165002853 Cd14/Tnf 2
BP GO:0060760 positive regulation of response to cytokine stimulus 2/49 65/28564 0.00559693570104903 0.0253108948658826 0.0126434165002853 Tlr2/Csf1 2
BP GO:0002262 myeloid cell homeostasis 3/49 214/28564 0.00592900513430251 0.0266485317520972 0.0133115991294721 Ccl2/Mafb/Csf1 3
BP GO:0001954 positive regulation of cell-matrix adhesion 2/49 67/28564 0.00593648189551371 0.0266485317520972 0.0133115991294721 Sdc4/Csf1 2
BP GO:0030837 negative regulation of actin filament polymerization 2/49 67/28564 0.00593648189551371 0.0266485317520972 0.0133115991294721 Tlr2/Capg 2
BP GO:0032233 positive regulation of actin filament bundle assembly 2/49 68/28564 0.00610971451308193 0.0272254839400017 0.0135998009829064 Plek/Sdc4 2
BP GO:0070231 T cell apoptotic process 2/49 68/28564 0.00610971451308193 0.0272254839400017 0.0135998009829064 Lgals3/Adam8 2
BP GO:0097006 regulation of plasma lipoprotein particle levels 2/49 68/28564 0.00610971451308193 0.0272254839400017 0.0135998009829064 Msr1/Lpl 2
BP GO:0001503 ossification 4/49 427/28564 0.00613861814476218 0.0272877259135779 0.0136308923844508 Spp1/Tnf/Srgn/Csf1 4
BP GO:0007204 positive regulation of cytosolic calcium ion concentration 3/49 218/28564 0.00623947266392237 0.0276017350048091 0.0137877476733037 Ccl3/C5ar1/C3ar1 3
BP GO:0051048 negative regulation of secretion 3/49 218/28564 0.00623947266392237 0.0276017350048091 0.0137877476733037 P2ry12/Tnf/Il1rn 3
BP GO:0000768 syncytium formation by plasma membrane fusion 2/49 70/28564 0.00646305841918175 0.0283846339707814 0.0141788250238628 Adam8/Cd9 2
BP GO:0015800 acidic amino acid transport 2/49 70/28564 0.00646305841918175 0.0283846339707814 0.0141788250238628 Tnf/Il1rn 2
BP GO:0140253 cell-cell fusion 2/49 70/28564 0.00646305841918175 0.0283846339707814 0.0141788250238628 Adam8/Cd9 2
BP GO:0048839 inner ear development 3/49 221/28564 0.00647860190392455 0.0283846658956119 0.0141788409711033 Sdc4/Mafb/C1qb 3
BP GO:0008217 regulation of blood pressure 3/49 222/28564 0.00655951388267579 0.0286250982618443 0.0142989428704053 Tnf/C3ar1/Slc2a5 3
BP GO:0002285 lymphocyte activation involved in immune response 3/49 223/28564 0.00664102890821856 0.0286250982618443 0.0142989428704053 Lgals3/Irf8/Lgals1 3
BP GO:0030193 regulation of blood coagulation 2/49 71/28564 0.006643153619607 0.0286250982618443 0.0142989428704053 Plaur/Cd9 2
BP GO:0032507 maintenance of protein location in cell 2/49 71/28564 0.006643153619607 0.0286250982618443 0.0142989428704053 Srgn/Hk2 2
BP GO:0046324 regulation of glucose import 2/49 71/28564 0.006643153619607 0.0286250982618443 0.0142989428704053 Tnf/Hk2 2
BP GO:0060986 endocrine hormone secretion 2/49 71/28564 0.006643153619607 0.0286250982618443 0.0142989428704053 Spp1/Dab2 2
BP GO:1904377 positive regulation of protein localization to cell periphery 2/49 71/28564 0.006643153619607 0.0286250982618443 0.0142989428704053 Tnf/Lgals3 2
BP GO:0009306 protein secretion 4/49 438/28564 0.00670588832256859 0.0287597604820019 0.0143662099719965 Tlr2/Tnf/Plek/Il1rn 4
BP GO:0031331 positive regulation of cellular catabolic process 4/49 438/28564 0.00670588832256859 0.0287597604820019 0.0143662099719965 Tlr2/Tnf/Adam8/Dab2 4
BP GO:0035592 establishment of protein localization to extracellular region 4/49 439/28564 0.00675912495816399 0.0289201903947672 0.0144463486718308 Tlr2/Tnf/Plek/Il1rn 4
BP GO:0006949 syncytium formation 2/49 72/28564 0.00682552029265555 0.0290681248827079 0.0145202455986563 Adam8/Cd9 2
BP GO:0007584 response to nutrient 2/49 72/28564 0.00682552029265555 0.0290681248827079 0.0145202455986563 Spp1/Lpl 2
BP GO:0050866 negative regulation of cell activation 3/49 227/28564 0.00697314215983537 0.0296277458744633 0.0147997900919884 Lgals3/Sdc4/Cd9 3
BP GO:0045428 regulation of nitric oxide biosynthetic process 2/49 73/28564 0.0070101504438768 0.0296470945855623 0.0148094552505877 Tlr2/Tnf 2
BP GO:1900046 regulation of hemostasis 2/49 73/28564 0.0070101504438768 0.0296470945855623 0.0148094552505877 Plaur/Cd9 2
BP GO:0071692 protein localization to extracellular region 4/49 445/28564 0.00708445829449845 0.0298921600555396 0.0149318714995263 Tlr2/Tnf/Plek/Il1rn 4
BP GO:0006869 lipid transport 4/49 447/28564 0.00719517061627197 0.0300205135893045 0.0149959872566053 Msr1/Spp1/Plin2/Dab2 4
BP GO:0010633 negative regulation of epithelial cell migration 2/49 74/28564 0.00719703609858532 0.0300205135893045 0.0149959872566053 Tnf/Cd63 2
BP GO:0032481 positive regulation of type I interferon production 2/49 74/28564 0.00719703609858532 0.0300205135893045 0.0149959872566053 Cd14/Tlr2 2
BP GO:0043506 regulation of JUN kinase activity 2/49 74/28564 0.00719703609858532 0.0300205135893045 0.0149959872566053 Tnf/Il1rn 2
BP GO:0099024 plasma membrane invagination 2/49 74/28564 0.00719703609858532 0.0300205135893045 0.0149959872566053 Msr1/Fcgr3 2
BP GO:0043542 endothelial cell migration 3/49 230/28564 0.00722861398321118 0.0300835483993777 0.0150274746995422 Tnf/Adam8/Lgmn 3
BP GO:0002220 innate immune response activating cell surface receptor signaling pathway 2/49 75/28564 0.00738616930181873 0.0305998442503919 0.0152853772160803 Cd14/Tlr2 2
BP GO:0050818 regulation of coagulation 2/49 75/28564 0.00738616930181873 0.0305998442503919 0.0152853772160803 Plaur/Cd9 2
BP GO:0002712 regulation of B cell mediated immunity 2/49 76/28564 0.00757754211829571 0.0312387849148145 0.0156045438430237 Tnf/Fcgr3 2
BP GO:0002889 regulation of immunoglobulin mediated immune response 2/49 76/28564 0.00757754211829571 0.0312387849148145 0.0156045438430237 Tnf/Fcgr3 2
BP GO:0007015 actin filament organization 4/49 454/28564 0.00759169157207314 0.0312387849148145 0.0156045438430237 Tlr2/Plek/Capg/Sdc4 4
BP GO:0002218 activation of innate immune response 3/49 236/28564 0.00775610656044688 0.0316917073601509 0.015830789779766 Cd14/Tlr2/Tnf 3
BP GO:1901617 organic hydroxy compound biosynthetic process 3/49 236/28564 0.00775610656044688 0.0316917073601509 0.015830789779766 Tnf/Plek/Dab2 3
BP GO:0014009 glial cell proliferation 2/49 77/28564 0.00777114663237417 0.0316917073601509 0.015830789779766 Tnf/Csf1 2
BP GO:0080164 regulation of nitric oxide metabolic process 2/49 77/28564 0.00777114663237417 0.0316917073601509 0.015830789779766 Tlr2/Tnf 2
BP GO:0050679 positive regulation of epithelial cell proliferation 3/49 237/28564 0.00784617930852195 0.0319264356273265 0.0159480423408476 Ccl2/C5ar1/Tnf 3
BP GO:1901184 regulation of ERBB signaling pathway 2/49 78/28564 0.00796697494800943 0.0323459182889183 0.0161575842805244 Plaur/Lgmn 2
BP GO:0032984 protein-containing complex disassembly 3/49 240/28564 0.00812011585953097 0.0328945713422685 0.0164316500180029 Tnf/Plek/Capg 3
BP GO:0051651 maintenance of location in cell 3/49 242/28564 0.00830584853157618 0.0334246371524002 0.0166964309688768 Srgn/Hk2/Ftl1 3
BP GO:0097191 extrinsic apoptotic signaling pathway 3/49 242/28564 0.00830584853157618 0.0334246371524002 0.0166964309688768 Tnf/Lgals3/Dab2 3
BP GO:1901888 regulation of cell junction assembly 3/49 242/28564 0.00830584853157618 0.0334246371524002 0.0166964309688768 Tlr2/Tnf/Sdc4 3
BP GO:0009988 cell-cell recognition 2/49 80/28564 0.0083652714975084 0.0335161206709383 0.0167421292436283 Lgals3/Cd9 2
BP GO:2000573 positive regulation of DNA biosynthetic process 2/49 80/28564 0.0083652714975084 0.0335161206709383 0.0167421292436283 Tnf/C3ar1 2
BP GO:0051403 stress-activated MAPK cascade 3/49 243/28564 0.0083996502204389 0.0335802209031551 0.0167741488912139 Tnf/Dab2/Gadd45b 3
BP GO:0045453 bone resorption 2/49 81/28564 0.00856772403689464 0.0341029015586198 0.0170352407751121 Spp1/Adam8 2
BP GO:0071277 cellular response to calcium ion 2/49 81/28564 0.00856772403689464 0.0341029015586198 0.0170352407751121 Alox5ap/Lgmn 2
BP GO:0008625 extrinsic apoptotic signaling pathway via death domain receptors 2/49 82/28564 0.0087723689887997 0.0346503150770003 0.0173086873342893 Tnf/Lgals3 2
BP GO:0010324 membrane invagination 2/49 82/28564 0.0087723689887997 0.0346503150770003 0.0173086873342893 Msr1/Fcgr3 2
BP GO:0043154 negative regulation of cysteine-type endopeptidase activity involved in apoptotic process 2/49 82/28564 0.0087723689887997 0.0346503150770003 0.0173086873342893 Tnf/Plaur 2
BP GO:0071241 cellular response to inorganic substance 3/49 247/28564 0.00878111432985831 0.0346503150770003 0.0173086873342893 Mt1/Alox5ap/Lgmn 3
BP GO:0010632 regulation of epithelial cell migration 3/49 249/28564 0.00897561348375568 0.0351176471760313 0.0175421312485923 Tnf/Cd63/Lgmn 3
BP GO:0072593 reactive oxygen species metabolic process 3/49 249/28564 0.00897561348375568 0.0351176471760313 0.0175421312485923 Tnf/Cybb/Hk2 3
BP GO:0002090 regulation of receptor internalization 2/49 83/28564 0.00897919855454166 0.0351176471760313 0.0175421312485923 Cd63/Dab2 2
BP GO:0032272 negative regulation of protein polymerization 2/49 83/28564 0.00897919855454166 0.0351176471760313 0.0175421312485923 Tlr2/Capg 2
BP GO:0034329 cell junction assembly 4/49 477/28564 0.00899565346381098 0.0351176471760313 0.0175421312485923 Tlr2/Tnf/Sdc4/Cd9 4
BP GO:0001906 cell killing 3/49 250/28564 0.00907380793790529 0.0353472219670639 0.0176568095211848 Ccl2/Fcgr3/Lgals3 3
BP GO:2000116 regulation of cysteine-type endopeptidase activity 3/49 251/28564 0.0091726334658379 0.035640871448823 0.0178034946827583 Tnf/Plaur/Lgmn 3
BP GO:0048002 antigen processing and presentation of peptide antigen 2/49 84/28564 0.00918820495478687 0.035640871448823 0.0178034946827583 Fcgr3/Ctsl 2
BP GO:0050870 positive regulation of T cell activation 3/49 252/28564 0.00927209092208408 0.0358900638022195 0.0179279724117906 Ccl2/Adam8/Lgals1 3
BP GO:0048732 gland development 4/49 483/28564 0.0093880165433445 0.0361529853572893 0.0180593082158095 Tnf/Plaur/Mafb/Csf1 4
BP GO:0043112 receptor metabolic process 2/49 85/28564 0.00939938042950871 0.0361529853572893 0.0180593082158095 Dab2/Lgmn 2
BP GO:0070228 regulation of lymphocyte apoptotic process 2/49 85/28564 0.00939938042950871 0.0361529853572893 0.0180593082158095 Lgals3/Adam8 2
BP GO:0002831 regulation of response to biotic stimulus 4/49 485/28564 0.00952125268977673 0.0365123376168982 0.0182388135360532 Cd14/Tlr2/Tnf/Adam8 4
BP GO:0031098 stress-activated protein kinase signaling cascade 3/49 255/28564 0.00957426326042553 0.0365123376168982 0.0182388135360532 Tnf/Dab2/Gadd45b 3
BP GO:0043583 ear development 3/49 255/28564 0.00957426326042553 0.0365123376168982 0.0182388135360532 Sdc4/Mafb/C1qb 3
BP GO:0006809 nitric oxide biosynthetic process 2/49 86/28564 0.00961271723794639 0.0365123376168982 0.0182388135360532 Tlr2/Tnf 2
BP GO:0045661 regulation of myoblast differentiation 2/49 86/28564 0.00961271723794639 0.0365123376168982 0.0182388135360532 Ccl9/Tnf 2
BP GO:1902117 positive regulation of organelle assembly 2/49 86/28564 0.00961271723794639 0.0365123376168982 0.0182388135360532 Tnf/Sdc4 2
BP GO:0019058 viral life cycle 3/49 257/28564 0.00977888635822973 0.0370664426898044 0.0185156026918217 Tnf/Lgals1/Ctsb 3
BP GO:0034103 regulation of tissue remodeling 2/49 87/28564 0.00982820765856398 0.037099453289662 0.018532092300946 Spp1/Adam8 2
BP GO:0046323 glucose import 2/49 87/28564 0.00982820765856398 0.037099453289662 0.018532092300946 Tnf/Hk2 2
BP GO:0035304 regulation of protein dephosphorylation 2/49 88/28564 0.0100458439890092 0.037687385971088 0.0188257791818243 Tnf/Rcan1 2
BP GO:0043525 positive regulation of neuron apoptotic process 2/49 88/28564 0.0100458439890092 0.037687385971088 0.0188257791818243 Ccl3/Tnf 2
BP GO:0050810 regulation of steroid biosynthetic process 2/49 88/28564 0.0100458439890092 0.037687385971088 0.0188257791818243 Tnf/Dab2 2
BP GO:0040014 regulation of multicellular organism growth 2/49 89/28564 0.0102656185460729 0.0383543662242845 0.0191589522752022 Csf1/Lgmn 2
BP GO:0050848 regulation of calcium-mediated signaling 2/49 89/28564 0.0102656185460729 0.0383543662242845 0.0191589522752022 Tnf/Rcan1 2
BP GO:0014015 positive regulation of gliogenesis 2/49 90/28564 0.0104875236656475 0.0388655288785761 0.0194142906333221 Tlr2/Tnf 2
BP GO:0031638 zymogen activation 2/49 90/28564 0.0104875236656475 0.0388655288785761 0.0194142906333221 Plaur/Lgmn 2
BP GO:0051384 response to glucocorticoid 2/49 90/28564 0.0104875236656475 0.0388655288785761 0.0194142906333221 Tnf/Il1rn 2
BP GO:1900076 regulation of cellular response to insulin stimulus 2/49 90/28564 0.0104875236656475 0.0388655288785761 0.0194142906333221 Tnf/Lpl 2
BP GO:0032944 regulation of mononuclear cell proliferation 3/49 264/28564 0.0105151686969231 0.0388890955653412 0.0194260627748399 Lgals3/Sdc4/Csf1 3
BP GO:0010827 regulation of glucose transmembrane transport 2/49 91/28564 0.0107115517026872 0.0394556551629224 0.0197090732729834 Tnf/Hk2 2
BP GO:0043242 negative regulation of protein-containing complex disassembly 2/49 91/28564 0.0107115517026872 0.0394556551629224 0.0197090732729834 Tnf/Capg 2
BP GO:0010466 negative regulation of peptidase activity 3/49 267/28564 0.0108403358150281 0.0398496851791877 0.0199059009883074 Tnf/Plaur/Ctsb 3
BP GO:0046209 nitric oxide metabolic process 2/49 92/28564 0.0109376950311664 0.0401268450239779 0.0200443491693538 Tlr2/Tnf 2
BP GO:0048708 astrocyte differentiation 2/49 93/28564 0.0111659460440396 0.0408821311071351 0.0204216332036333 C5ar1/C1qa 2
BP GO:0006835 dicarboxylic acid transport 2/49 94/28564 0.0113962971532009 0.041558951894008 0.0207597218863855 Tnf/Il1rn 2
BP GO:2001057 reactive nitrogen species metabolic process 2/49 94/28564 0.0113962971532009 0.041558951894008 0.0207597218863855 Tlr2/Tnf 2
BP GO:0010001 glial cell differentiation 3/49 274/28564 0.0116216413782986 0.0421541853617313 0.021057055690157 C5ar1/Tlr2/C1qa 3
BP GO:0043270 positive regulation of monoatomic ion transport 3/49 274/28564 0.0116216413782986 0.0421541853617313 0.021057055690157 Ccl2/P2ry12/Lgals3 3
BP GO:1901879 regulation of protein depolymerization 2/49 95/28564 0.0116287407894431 0.0421541853617313 0.021057055690157 Plek/Capg 2
BP GO:0051091 positive regulation of DNA-binding transcription factor activity 3/49 276/28564 0.0118507025107322 0.0428737296774411 0.021416485829713 Tlr2/Tnf/Adam8 3
BP GO:0001894 tissue homeostasis 3/49 278/28564 0.0120823645430203 0.0435166780836761 0.0217376544225778 Spp1/Adam8/Csf1 3
BP GO:0060249 anatomical structure homeostasis 3/49 278/28564 0.0120823645430203 0.0435166780836761 0.0217376544225778 Spp1/Adam8/Csf1 3
BP GO:0046718 viral entry into host cell 2/49 97/28564 0.0120998754605952 0.0435166780836761 0.0217376544225778 Lgals1/Ctsb 2
BP GO:0002312 B cell activation involved in immune response 2/49 98/28564 0.0123385514512231 0.0442878850714827 0.0221228913415582 Irf8/Lgals1 2
BP GO:0031960 response to corticosteroid 2/49 100/28564 0.0128220832724733 0.0459332277231543 0.0229447805928469 Tnf/Il1rn 2
BP GO:0044409 entry into host 2/49 101/28564 0.0130669241711216 0.0466274813684359 0.0232915774185083 Lgals1/Ctsb 2
BP GO:0045185 maintenance of protein location 2/49 101/28564 0.0130669241711216 0.0466274813684359 0.0232915774185083 Srgn/Hk2 2
BP GO:0070663 regulation of leukocyte proliferation 3/49 287/28564 0.0131571572188402 0.0468579458846416 0.0234067001307777 Lgals3/Sdc4/Csf1 3
BP GO:2000117 negative regulation of cysteine-type endopeptidase activity 2/49 102/28564 0.0133138051381929 0.0473235836332266 0.0236392976752268 Tnf/Plaur 2
BP GO:0062207 regulation of pattern recognition receptor signaling pathway 2/49 103/28564 0.0135627187542256 0.0481147323572236 0.0240344959834718 Cd14/Tlr2 2
BP GO:0002532 production of molecular mediator involved in inflammatory response 2/49 104/28564 0.0138136576182966 0.0489099854043177 0.0244317445023728 Tnf/Alox5ap 2
BP GO:0033077 T cell differentiation in thymus 2/49 105/28564 0.0140666143479817 0.0497092928699471 0.02483101830337 Adam8/Mafb 2
CC GO:0045121 membrane raft 7/50 390/28585 5.02641537235609e-06 0.000291343045469019 0.000180239926559781 P2ry12/Cd14/Tlr2/Tnf/Tuba1c/Sdc4/Ctsb 7
CC GO:0098857 membrane microdomain 7/50 391/28585 5.11128149945647e-06 0.000291343045469019 0.000180239926559781 P2ry12/Cd14/Tlr2/Tnf/Tuba1c/Sdc4/Ctsb 7
CC GO:0030139 endocytic vesicle 5/50 213/28585 3.53513783969886e-05 0.00134335237908557 0.000831067492139731 Ccl2/Adam8/Cybb/Capg/Ftl1 5
CC GO:0005581 collagen trimer 3/50 81/28585 0.000390278326601976 0.0102743430549779 0.00635624177916451 Msr1/C1qa/C1qb 3
CC GO:0005767 secondary lysosome 2/50 18/28585 0.000450629081358678 0.0102743430549779 0.00635624177916451 Adam8/Ftl1 2
CC GO:0045335 phagocytic vesicle 3/50 115/28585 0.00108324750957172 0.0205817026818628 0.0127329093230361 Adam8/Cybb/Capg 3
CC GO:0034358 plasma lipoprotein particle 2/50 43/28585 0.00258638061769981 0.0368559238022222 0.0228009870244588 Msr1/Lpl 2
CC GO:1990777 lipoprotein particle 2/50 43/28585 0.00258638061769981 0.0368559238022222 0.0228009870244588 Msr1/Lpl 2
CC GO:0032994 protein-lipid complex 2/50 46/28585 0.00295455871126696 0.0374244103427148 0.0231526822988171 Msr1/Lpl 2
CC GO:0098636 protein complex involved in cell adhesion 2/50 57/28585 0.00450053351284913 0.0457338728216227 0.0282933469902929 Plaur/Lgals1 2
CC GO:0062023 collagen-containing extracellular matrix 4/50 390/28585 0.00479229605256202 0.0457338728216227 0.0282933469902929 Lgals3/Ctsl/Lgals1/Ctsb 4
CC GO:0005771 multivesicular body 2/50 59/28585 0.00481409187596029 0.0457338728216227 0.0282933469902929 Ctsl/Cd63 2
CC GO:0016324 apical plasma membrane 4/50 406/28585 0.00551827578984116 0.0483910338493763 0.0299372046898265 Slc2a5/Ctsb/Cd9/Dab2 4
MF GO:0005125 cytokine activity 9/49 231/28171 2.21525818770706e-10 3.3893450271918e-08 1.56233998501445e-08 Ccl2/Ccl4/Ccl9/Ccl3/Spp1/Tnf/Il1rn/Cxcl16/Csf1 9
MF GO:0008009 chemokine activity 5/49 42/28171 1.04587285130379e-08 8.000927312474e-07 3.68807794933442e-07 Ccl2/Ccl4/Ccl9/Ccl3/Cxcl16 5
MF GO:0005126 cytokine receptor binding 8/49 316/28171 6.93840934447795e-08 3.53858876568375e-06 1.63113482835096e-06 Ccl2/Ccl4/Ccl9/Ccl3/Tnf/Il1rn/Cxcl16/Csf1 8
MF GO:0042379 chemokine receptor binding 5/49 80/28171 2.81296421952648e-07 1.07595881396888e-05 4.95970007127038e-06 Ccl2/Ccl4/Ccl9/Ccl3/Cxcl16 5
MF GO:0048020 CCR chemokine receptor binding 4/49 58/28171 3.19775442404484e-06 9.78512853757722e-05 4.51051676654746e-05 Ccl2/Ccl4/Ccl9/Ccl3 4
MF GO:0048029 monosaccharide binding 4/49 92/28171 2.01651531195743e-05 0.000514211404549144 0.000237028992809031 Lgals3/Hk2/Lgals1/Slc2a5 4
MF GO:0042056 chemoattractant activity 3/49 42/28171 5.41227796451076e-05 0.00111137052592183 0.000512293259282855 Ccl9/Ccl3/Lgals3 3
MF GO:0043394 proteoglycan binding 3/49 43/28171 5.81108771723835e-05 0.00111137052592183 0.000512293259282855 Ctsl/Lpl/Ctsb 3
MF GO:0030246 carbohydrate binding 5/49 283/28171 0.000131181857638732 0.0020899560807881 0.0009633784479725 Cd72/Lgals3/Hk2/Lgals1/Slc2a5 5
MF GO:0050840 extracellular matrix binding 3/49 58/28171 0.000142653789161548 0.0020899560807881 0.0009633784479725 Spp1/Lgals3/Lgals1 3
MF GO:0005178 integrin binding 4/49 154/28171 0.000150258280318099 0.0020899560807881 0.0009633784479725 Spp1/Adam8/Cd9/Dab2 4
MF GO:0045028 G protein-coupled purinergic nucleotide receptor activity 2/49 12/28171 0.000193446600364046 0.00246644415464158 0.00113692300213957 P2ry12/P2ry13 2
MF GO:0001664 G protein-coupled receptor binding 5/49 328/28171 0.000260044499056581 0.0027145208224522 0.0012512755081135 Ccl2/Ccl4/Ccl9/Ccl3/Cxcl16 5
MF GO:0005518 collagen binding 3/49 71/28171 0.000260076820865651 0.0027145208224522 0.0012512755081135 Srgn/Ctsl/Ctsb 3
MF GO:0004875 complement receptor activity 2/49 14/28171 0.000266129492397274 0.0027145208224522 0.0012512755081135 C5ar1/C3ar1 2
MF GO:0034987 immunoglobulin receptor binding 2/49 16/28171 0.000350160799458232 0.00334841264481934 0.00154347194498037 Fcgr3/Lgals3 2
MF GO:0038024 cargo receptor activity 3/49 82/28171 0.000397606637799132 0.00357845974019219 0.00164951360573015 Msr1/Cxcl16/Dab2 3
MF GO:0001614 purinergic nucleotide receptor activity 2/49 19/28171 0.000497318710458643 0.00380448813500862 0.001753702821091 P2ry12/P2ry13 2
MF GO:0016502 nucleotide receptor activity 2/49 19/28171 0.000497318710458643 0.00380448813500862 0.001753702821091 P2ry12/P2ry13 2
MF GO:0070492 oligosaccharide binding 2/49 19/28171 0.000497318710458643 0.00380448813500862 0.001753702821091 Lgals3/Lgals1 2
MF GO:0004197 cysteine-type endopeptidase activity 3/49 99/28171 0.000689751575472984 0.00502533290701746 0.00231645892514737 Ctsl/Ctsb/Lgmn 3
MF GO:0019865 immunoglobulin binding 2/49 27/28171 0.00101178439454331 0.0070365005620512 0.00324351935092831 Fcgr3/Lgals3 2
MF GO:0001848 complement binding 2/49 28/28171 0.00108840537735805 0.00724026185807748 0.00333744440654414 C5ar1/C3ar1 2
MF GO:0071813 lipoprotein particle binding 2/49 30/28171 0.00124975343298375 0.00764849100986057 0.00352562021094364 Msr1/Lpl 2
MF GO:0071814 protein-lipid complex binding 2/49 30/28171 0.00124975343298375 0.00764849100986057 0.00352562021094364 Msr1/Lpl 2
MF GO:0043236 laminin binding 2/49 31/28171 0.00133446202089043 0.00785279573831677 0.00361979576516838 Lgals3/Lgals1 2
MF GO:0038187 pattern recognition receptor activity 2/49 32/28171 0.00142184803032177 0.00805713883849001 0.0037139890070783 Cd14/Tlr2 2
MF GO:0140375 immune receptor activity 3/49 132/28171 0.00158267857873369 0.00864820794808049 0.00398644604417883 C5ar1/Fcgr3/C3ar1 3
MF GO:0001968 fibronectin binding 2/49 36/28171 0.00179798291526769 0.00948590986330883 0.0043725900298706 Ctsl/Sdc4 2
MF GO:0001530 lipopolysaccharide binding 2/49 37/28171 0.00189861870460792 0.00960251871552619 0.00442634161637602 Cd14/Tlr2 2
MF GO:0050839 cell adhesion molecule binding 4/49 305/28171 0.00194560836719812 0.00960251871552619 0.00442634161637602 Spp1/Adam8/Cd9/Dab2 4
MF GO:0005044 scavenger receptor activity 2/49 43/28171 0.00255719310588086 0.0122265795374929 0.00563591901625058 Msr1/Cxcl16 2
MF GO:0008234 cysteine-type peptidase activity 3/49 175/28171 0.00351999950426232 0.0160549025001911 0.00740060865161887 Ctsl/Ctsb/Lgmn 3
MF GO:0042277 peptide binding 4/49 361/28171 0.00356775611115357 0.0160549025001911 0.00740060865161887 Msr1/Tlr2/Ctsl/Ctsb 4
MF GO:0005080 protein kinase C binding 2/49 62/28171 0.00524367696064201 0.0229223592850922 0.0105662062064065 Plek/Sdc4 2
MF GO:0001540 amyloid-beta binding 2/49 71/28171 0.00682263951614617 0.0289865847818555 0.0133615492286503 Msr1/Tlr2 2
MF GO:0005200 structural constituent of cytoskeleton 2/49 72/28171 0.00700982769234413 0.0289865847818555 0.0133615492286503 Tubb6/Tuba1c 2
MF GO:0033218 amide binding 4/49 450/28171 0.00772285674072403 0.030917592045404 0.0142516592159757 Msr1/Tlr2/Ctsl/Ctsb 4
MF GO:0005539 glycosaminoglycan binding 3/49 235/28171 0.00796120549607735 0.030917592045404 0.0142516592159757 Ccl2/Tlr2/Lpl 3
MF GO:0004175 endopeptidase activity 4/49 456/28171 0.00808303060010561 0.030917592045404 0.0142516592159757 Adam8/Ctsl/Ctsb/Lgmn 4
MF GO:0005546 phosphatidylinositol-4	5-bisphosphate binding 2/49 94/28171 0.0117001560647858 0.0436615579978593 0.0201260707661271 Capg/Dab2 2
