# Supplementary material for: Identification and validation of microglia-associated genes in ischemic stroke using single-cell and bulk RNA-seq
Source: Mol Brain. 2025 Dec 7;18:91. doi: 10.1186/s13041-025-01259-x (PMC12699842; doi:10.1186/s13041-025-01259-x)
Supplement: Supplementary file 2 — Additional file 2. Result of Kyoto encyclopedia of genes and genomes (KEGG) enrichment analysis. [file 13041_2025_1259_MOESM2_ESM.xlsx]

## Sheet: Supplementary Table S2
Table S2 Result of Kyoto Encyclopedia of Genes and Genomes(KEGG) enrichment analysis
category subcategory ID Description GeneRatio BgRatio pvalue p.adjust qvalue geneID Count
Cellular Processes Transport and catabolism mmu04145 Phagosome - Mus musculus (house mouse) 8/43 183/9573 1.25253402203426e-06 0.000153164840093657 0.000107870731758502 20288/67951/12475/24088/14131/13058/22146/13039 8
Human Diseases Immune disease mmu05323 Rheumatoid arthritis - Mus musculus (house mouse) 6/43 87/9573 2.2038106488296e-06 0.000153164840093657 0.000107870731758502 20296/20302/24088/21926/13039/12977 6
Environmental Information Processing Signaling molecules and interaction mmu04061 Viral protein interaction with cytokine and cytokine receptor - Mus musculus (house mouse) 6/43 95/9573 3.69332014978797e-06 0.000171123833606843 0.000120518868045713 20296/20303/20308/20302/21926/12977 6
Human Diseases Infectious disease: parasitic mmu05142 Chagas disease - Mus musculus (house mouse) 6/43 103/9573 5.91662068289347e-06 0.000173972674495766 0.000122525245953095 20296/20302/24088/21926/12259/12260 6
Organismal Systems Immune system mmu04620 Toll-like receptor signaling pathway - Mus musculus (house mouse) 6/43 104/9573 6.25800987394842e-06 0.000173972674495766 0.000122525245953095 20303/20302/20750/12475/24088/21926 6
Human Diseases Infectious disease: viral mmu05171 Coronavirus disease - COVID-19 - Mus musculus (house mouse) 9/43 334/9573 1.358758321726e-05 0.000314779011199856 0.000221692147228979 20296/12273/24088/21926/14131/13058/12267/12259/12260 9
Human Diseases Infectious disease: bacterial mmu05133 Pertussis - Mus musculus (house mouse) 5/43 77/9573 2.23843615477024e-05 0.000444489465018663 0.000313044454727267 12475/21926/15900/12259/12260 5
Human Diseases Endocrine and metabolic disease mmu04936 Alcoholic liver disease - Mus musculus (house mouse) 6/43 141/9573 3.57304428019691e-05 0.000620816443684212 0.000437227786918832 12273/12475/21926/12267/12259/12260 6
Environmental Information Processing Signaling molecules and interaction mmu04060 Cytokine-cytokine receptor interaction - Mus musculus (house mouse) 8/43 294/9573 4.09028820092136e-05 0.000631722288808965 0.00044490854115285 20296/20303/20308/20302/21926/16181/66102/12977 8
Organismal Systems Immune system mmu04610 Complement and coagulation cascades - Mus musculus (house mouse) 5/43 94/9573 5.87826593701291e-05 0.000817078965244795 0.00057545129699179 12273/18793/12267/12259/12260 5
Human Diseases Infectious disease: bacterial mmu05150 Staphylococcus aureus infection - Mus musculus (house mouse) 5/43 128/9573 0.000253154050023773 0.00293807150534002 0.00206922112833489 12273/14131/12267/12259/12260 5
Human Diseases Infectious disease: parasitic mmu05140 Leishmaniasis - Mus musculus (house mouse) 4/43 70/9573 0.000260921585276683 0.00293807150534002 0.00206922112833489 24088/21926/14131/13058 4
Human Diseases Cancer: overview mmu05205 Proteoglycans in cancer - Mus musculus (house mouse) 6/43 204/9573 0.000274783665967053 0.00293807150534002 0.00206922112833489 24088/21926/18793/13039/20971/12512 6
Cellular Processes Cell growth and death mmu04210 Apoptosis - Mus musculus (house mouse) 5/43 135/9573 0.000324145932548059 0.0032183060445843 0.00226658434037364 21926/22146/13039/13030/17873 5
Human Diseases Cardiovascular disease mmu05417 Lipid and atherosclerosis - Mus musculus (house mouse) 6/43 217/9573 0.000382920844074772 0.00354839982175956 0.00249906235080378 20296/20302/12475/24088/21926/13058 6
Organismal Systems Immune system mmu04612 Antigen processing and presentation - Mus musculus (house mouse) 4/43 87/9573 0.00059935035084782 0.00520685617299044 0.00366707780452943 21926/13039/13030/19141 4
Organismal Systems Immune system mmu04640 Hematopoietic cell lineage - Mus musculus (house mouse) 4/43 94/9573 0.000802645688529123 0.00656280886503224 0.00462204637976523 12475/21926/12977/12527 4
Human Diseases Neurodegenerative disease mmu05020 Prion disease - Mus musculus (house mouse) 6/43 273/9573 0.00127805194499218 0.00952617366487997 0.00670908103622747 67951/21926/13058/22146/12259/12260 6
Environmental Information Processing Signal transduction mmu04064 NF-kappa B signaling pathway - Mus musculus (house mouse) 4/43 107/9573 0.00130213884627856 0.00952617366487997 0.00670908103622747 20303/12475/21926/17873 4
Organismal Systems Immune system mmu04062 Chemokine signaling pathway - Mus musculus (house mouse) 5/43 193/9573 0.00163448336932265 0.0113596594167924 0.00800036596563191 20296/20303/20308/20302/66102 5
Human Diseases Infectious disease: bacterial mmu05134 Legionellosis - Mus musculus (house mouse) 3/43 60/9573 0.002417320345393 0.0160003584766489 0.0112687113845388 12475/24088/21926 3
Cellular Processes Transport and catabolism mmu04142 Lysosome - Mus musculus (house mouse) 4/43 136/9573 0.00313127213298442 0.0197839466584016 0.0139334118836149 13039/12512/13030/19141 4
Human Diseases Cardiovascular disease mmu05418 Fluid shear stress and atherosclerosis - Mus musculus (house mouse) 4/43 148/9573 0.00423946012844854 0.025621085124102 0.0180443840707421 20296/21926/13039/20971 4
Human Diseases Immune disease mmu05322 Systemic lupus erythematosus - Mus musculus (house mouse) 4/43 150/9573 0.00444687697197008 0.0257548291293267 0.0181385771225096 21926/14131/12259/12260 4
Human Diseases Infectious disease: parasitic mmu05144 Malaria - Mus musculus (house mouse) 3/43 77/9573 0.00490104961513841 0.0272498358601695 0.019191478492963 20296/24088/21926 3
Human Diseases Infectious disease: bacterial mmu05132 Salmonella infection - Mus musculus (house mouse) 5/43 252/9573 0.00516762532374019 0.0276269199999956 0.0194570508140825 67951/12475/24088/21926/22146 5
Human Diseases Neurodegenerative disease mmu05010 Alzheimer disease - Mus musculus (house mouse) 6/43 389/9573 0.00738913137852887 0.0380403430227968 0.0267910026589936 67951/21926/13058/22146/16956/12977 6
Human Diseases Infectious disease: bacterial mmu05152 Tuberculosis - Mus musculus (house mouse) 4/43 180/9573 0.00842529727292869 0.0418255828906103 0.0294568664053522 12475/24088/21926/14131 4
Human Diseases Endocrine and metabolic disease mmu04933 AGE-RAGE signaling pathway in diabetic complications - Mus musculus (house mouse) 3/43 101/9573 0.0103641727744913 0.0496765522639411 0.0349861367705152 20296/21926/13058 3
